# Supplementary material for: Patterns of Positive Selection in Seven Ant Genomes
Source: PubMed Central journal article supplement (PMC4069625; doi:10.1093/molbev/msu141), 2014-04-29
Supplement: supp_msu141_Roux_et_al_sup_information.pdf [file supp_msu141_Roux_et_al_sup_information.pdf]

Supplementary information for:

## **Patterns of positive selection in seven ant genomes**

Julien Roux<sup>1,2,5,7</sup>, Eyal Privman<sup>1,2,6</sup>, Sébastien Moretti<sup>1,2,3</sup>, Josephine T. Daub<sup>1,2,4</sup>, Marc Robinson-Rechavi<sup>1,2</sup>, Laurent Keller<sup>1</sup>

<sup>1</sup> Department of Ecology and Evolution, University of Lausanne, 1015 Lausanne, Switzerland

<sup>2</sup> SIB Swiss Institute of Bioinformatics, 1015 Lausanne, Switzerland

<sup>3</sup> Vital-IT group, SIB Swiss Institute of Bioinformatics, 1015 Lausanne, Switzerland

<sup>4</sup> CMPG, Institute of Ecology and Evolution, University of Bern, Baltzerstrasse 6, 3012 Bern, Switzerland

<sup>5</sup> Present address: Department of Human Genetics, University of Chicago, Chicago, IL 60637, USA

<sup>6</sup> Present address: Department of Evolutionary and Environmental Biology, University of Haifa, Israel

<sup>7</sup> Corresponding author: [Julien.Roux@unil.ch](mailto:Julien.Roux@unil.ch)

# Table of Content

|                                                                                      |           |
|--------------------------------------------------------------------------------------|-----------|
| <b>Supplementary text.....</b>                                                       | <b>3</b>  |
| <i>Potential sources of false positives in the scan for positive selection .....</i> | 3         |
| <i>Validation with the site test of Codeml .....</i>                                 | 5         |
| <i>Influence of false positives on the gene set enrichment approach.....</i>         | 6         |
| <i>Gene set enrichment test with KEGG pathways.....</i>                              | 7         |
| <i>Characterization of functional biases in the datasets.....</i>                    | 7         |
| <i>Comparison with other lineages .....</i>                                          | 9         |
| <b>Examples of Codeml control files for the branch-site test .....</b>               | <b>11</b> |
| <i>Alternative hypothesis.....</i>                                                   | 11        |
| <i>Null model.....</i>                                                               | 11        |
| <b>Examples of Codeml control files for the site test.....</b>                       | <b>12</b> |
| <i>Alternative hypothesis (M8) .....</i>                                             | 12        |
| <i>Null model (M8a).....</i>                                                         | 12        |
| <b>Newick files for 16 olfactory receptors subtrees .....</b>                        | <b>13</b> |
| <b>Figure S1 .....</b>                                                               | <b>22</b> |
| <b>Figure S2 .....</b>                                                               | <b>22</b> |
| <b>Figure S3 .....</b>                                                               | <b>23</b> |
| <b>Figure S4 .....</b>                                                               | <b>24</b> |
| <b>Figure S5 .....</b>                                                               | <b>25</b> |
| <b>Figure S6 .....</b>                                                               | <b>26</b> |
| <b>Figure S7 .....</b>                                                               | <b>26</b> |
| <b>References .....</b>                                                              | <b>28</b> |

## Supplementary text

### *Potential sources of false positives in the scan for positive selection*

Phylogenetic tests of positive selection in protein-coding genes usually contrast substitution rates at non-synonymous sites to substitution rates at synonymous sites, taken as a proxy to neutral rates of evolution. However a number of species are known to experience selective constraints at synonymous sites, potentially leading to false positives (Yang, dos Reis 2011). For example in most species of the *Drosophila* phylogeny, synonymous codons are optimized for better protein translation (Drosophila 12 Genomes Consortium 2007). In our dataset, nine out of the twelve species studied (the seven ants, *Tribolium castaneum* and *Nasonia vitripennis*) display low codon usage bias with synonymous sites likely to behave as neutral sites (Simola et al. 2013). For all branches tested deeper in the phylogenetic tree (in red in Figure 1), the most parsimonious scenario is that they did not experience constraints at synonymous sites either.

Schneider *et al.* postulated that higher rate of detection on long branches of phylogenetic trees (Table 2) might be due to saturation of  $d_S$ , leading to overestimation of  $d_N/d_S$  (Schneider et al. 2009). Previous work has shown that the branch-site test should not suffer seriously from this problem if the number of species used is large enough and the phylogenetic depth reasonable (Studer, Robinson-Rechavi 2009; Fletcher, Yang 2010; Yang, dos Reis 2011). These conditions are met in our dataset, so  $d_S$  saturation should not be an important concern in our study. Simulations also showed that increasing branch lengths indeed does lead to saturation of  $d_S$  but also decreases the power of the test, making it unlikely to result in false positives (Gharib, Robinson-Rechavi 2013). When we applied a stringent filtering on our results, and did not consider all tests where  $d_S$  on the foreground branch was higher than 1, the percentage of families with significant signal for an episode of positive selection dropped to 24% (1,034 families), indicating that the majority of the positives cannot be caused by saturation of  $d_S$ . The drop was less severe when only ant branches were considered (from 20% to

15%; 620 families), indicating that  $d_s$  saturation is more likely to affect the longest branches of our phylogeny (branch #8 leading to hymenoptera and branch #7 leading to ants and bees) than the branches of the ant lineage.

Another source of false positives could be sequencing and assembly errors (Mallick et al. 2009; Schneider et al. 2009). These are particularly critical with second generation sequencing technologies used for most genomes of our dataset. However, these errors should not be shared between multiple species, so they are only expected to affect the results of tests on terminal branches of the tree. Among the two technologies used to sequence the 7 ant genomes, Roche 454 was shown to yield a higher rate of sequencing errors than Illumina (Luo et al. 2012), but we did not observe any obvious relation between the proportion of significant genes in terminal ant branches and the technology used to sequence the genomes (Roche 454, Illumina or a mix of both technologies; Kruskal-Wallis test,  $p = 0.32$ ). When only internal branches of the phylogeny were considered, 1,481 families (35%) still displayed a significant signal for an episode of positive selection in any of the tested branches, and 267 families (6.3%) were significant on at least one the 6 internal branches of the ant lineage (197 of them – 74% – exclusively on these branches).

Finally, some studies have warned about the possibility that GC-biased gene conversion, a neutral process affecting genomes in very similar ways to positive selection, could lead to erroneous significance of the positive selection tests (Duret, Galtier 2009; Galtier et al. 2009; Ratnakumar et al. 2010). We have analyzed the G+C content at third codon positions ( $GC_3$ , more likely than first and second positions to reflect the action of neutral processes) of ant genes in families that had at least one branch significant in the ant lineage ( $FDR \leq 0.1$ ). We compared it to the  $GC_3$  of genes in families which had a FDR of 1 in all ant branches, and are thus not likely to include false negatives. The distribution of  $GC_3$  was not statistically different between the two groups (Kolmogorov-Smirnov test,  $p=0.27$ ). We then calculated the variation in G+C content at third codon positions ( $\Delta GC_3$ ) along each branch of the families analyzed (see Materials and Methods). If GC-biased gene conversion was affecting the results of the branch-site test, we would expect a significant positive association between the score of the branch-site test and sudden shifts in G+C

content at third codon positions. But the correlation was very small and negative, between  $\Delta GC_3$  and the score of the branch-site test ( $\Delta \ln L$ ) across all branches of the families tested (Spearman correlation  $r=-0.045$ ,  $p<10^{-15}$ ). If only branches which were significant at FDR=20% were considered, the correlation was much weaker ( $r=-0.0011$ ,  $p=0.95$ ). These results are consistent with a previous observation that  $\Delta GC_3$  explained a negligible amount of variation in the results of the branch-site test in vertebrate gene families (Studer et al. 2008). Thus, we are confident that the results from the branch-site test in ants are not strongly affected by potential false positives due to GC-biased gene conversion.

### ***Validation with the site test of Codeml***

To investigate how positive selection contributed to the evolution of large gene families, we applied the site test of Codeml on a more extensive dataset (not limited to single-copy orthologs, see Materials and Methods)(Yang et al. 2000). Not surprisingly, this yielded a much lower proportion of positives (11 families at 10% FDR; Table 1 and S19), because the site test detects families that experienced recurrent positive selection on the same sites on many branches of a phylogeny. This compares with only 22 single-ortholog gene families with significant signal for positive selection with the branch-site test in at least 4 different branches of their phylogenetic tree. Across gene families, there was a small but highly significant correlation between the site test scores (log-likelihood ratio) and the branch-site test scores (mean of transformed log-likelihood ratio, see Materials and Methods; Spearman correlation  $\rho=0.13$ ,  $p<10^{-15}$ ).

Finally, the gene set enrichment test applied on results of the site test confirmed the patterns observed with the branch-site test results, notably an enrichment of positive selection on mitochondrial functions (Table S13). Interestingly there was also a significant enrichment for functions related to amino acid transport, heme binding and detection of light stimulus involved in visual perception.

### *Influence of false positives on the gene set enrichment approach*

The gene set enrichment test based on results of the positive selection test was designed to attenuate the influence of potential false positives (see Materials and Methods). We considered for each family a score reflecting how consistently positive selection was experienced on the different branches of the ant phylogeny (Table 3). The influence of false positives, which are not likely to be detected on different branches of a same gene family, should be reduced. In addition, the gene set enrichment approach reduces the contribution of individual genes and rather favors functional categories including many good scoring genes. We observed that most of the top significant GO categories displayed a global shift towards large scores at the positive selection test, and were not called significant because of a single gene with an extreme high score (Figure S7).

Different post-filtering steps of the data indicated that the functional enrichment patterns were not driven by methodological biases or false positives. The results of the enrichment test were similarly consistent after filtering out i) all foreground terminal branches (“leaves”; Table S20); ii) all branches which displayed a  $d_s$  greater than 1 (Table S21); iii) all positives where the identification of positively selected residues in protein alignments failed (Table S22); iv) all branches where the alternative or the fixed model displayed convergence issues (Table S23); and v) all branches where the increase in G+C content at third codon positions was higher than 10% (Table S24). They were also consistent when the enrichment test was based on results from the dataset reprocessed with a different aligner (PAGAN) (Loytynoja, Vilella, Goldman 2012) and a different filtering method (GUIDANCE)(Penn et al. 2010; Privman, Penn, Pupko 2012)(Table S25), or subjected to a different test for positive selection, the site test (see above). Thus the functional insights from our scan for positive selection seemed quite robust.

Overall, our methodological choices may hamper the detection of a significant portion of positive selection events (e.g., species-specific events), but we feel that such high standard quality control steps should be applied systematically previous to large-scale scans for positive selection as they greatly reduce the rate of

false positives, which is otherwise a major concern (Markova-Raina, Petrov 2011). The benefit of alignment filtering has been estimated to exceed the loss of power due to the removal of some of the true positively selected sites, based on simulations (Jordan, Goldman 2012; Privman, Penn, Pupko 2012). Even after multiple quality checks, false positives may not be totally eliminated, which is why we favored a post-processing of the results that should not be very sensitive to the influence of such false positives.

### ***Gene set enrichment test with KEGG pathways***

To verify that the results of the gene set enrichment results were not strongly dependent on the annotation of Gene Ontology categories, we performed another enrichment test based on the annotation of KEGG pathways for *D. melanogaster* genes (Table S26). There was a significant enrichment for positively selected genes among genes annotated with the general term “metabolic pathways”. In particular, fatty acid, amino-acid, nucleotide, sugar, and the oxidative phosphorylation metabolic pathways were enriched. These results are consistent with the enrichment of Gene Ontology categories related to proteolysis, metabolism and mitochondrial activity (Table 3, Table S6, Table S25). In addition there was a significant enrichment for pathways related to translation (“ribosome” and “ribosome biogenesis in eukaryotes”) which were also previously observed with the Gene Ontology. Only the enrichment for the “RNA polymerase” pathway, composed of the constituents of the RNA polymerase complex, was not previously reported with the test based on Gene Ontology, but was in fact very close to the significance cutoff (e.g., FDR=22% for GO category “RNA polymerase activity”; Table S6).

### ***Characterization of functional biases in the datasets***

Gene families were filtered based on their topology and on the quality of their sequences (Materials and Methods). We sought to characterize the biases of the subsets of gene families used in this study compared to all annotated gene families available for the set of species analyzed. The single-copy orthologs dataset in ants shows an enrichment of genes linked to translation and GTPase activity, while genes

with receptor (e.g., neuropeptide, ionotropic glutamate, olfactory), catalytic (e.g., oxidoreductase, lipase, transaminase, peptidase), binding (e.g., vitamin, metal ion, DNA) or structural molecule (e.g., structural constituent of chitin-based cuticle) activity are depleted (Table S8). Some of the latter are of particular interest to ant biology but their depletion leads to a decreased power to analyze functional biases among positively selected genes.

The extensive dataset, including gene families that experienced gene duplication, gathered all OrthoDB gene families that passed our basic quality filters. But essentially the same functional categories were depleted, with the addition of taste receptor activity, defense response and spermatid nucleus differentiation (Table S10). These functional categories probably gather genes whose annotation is still incomplete in the analyzed genomes and require manual annotation. The functional categories that gained representation in this dataset are linked to transcriptional regulation: DNA binding, transcription factor (e.g., general RNA polymerase II transcription factor activity is enriched) and RNA binding proteins involved in mRNA splicing.

Of note, there were substantial differences with the functional biases found in datasets of single-copy orthologs from the 12 *Drosophila* species (*Drosophila* 12 Genomes Consortium 2007) or from 10 bee species (Woodard et al. 2011), that were processed through the same quality filtering pipeline (Table S7 and S11; Materials and Methods). The *Drosophila* dataset was enriched in odorant and pheromone binding and in genes involved in mitochondrial processes (e.g., NADH dehydrogenase and oxidoreductase activity, oxidation-reduction process, mitochondrial electron transport, mitochondrial DNA replication), while it was depleted in genes involved in chromatin organization, reproduction, brain development and morphogenesis (eye, wing). The bee dataset was enriched in protein folding activity, regulation of splicing and translation, and mitochondrial processes as well. Quite similar to ants, it was depleted in receptor activity (odorant, neurotransmitter, neuropeptide steroid hormone and ionotropic glutamate), but also in immune functions, transcription factor activity and morphogenesis (embryo, wing, leg, nervous system, tracheal system, ventral cord, midgut).



## ***Comparison with other lineages***

We compared our ant genomes dataset with the largest lineage-specific genomic datasets available for other insect groups. The first dataset gathers twelve genomes of *Drosophila* species (Diptera)(*Drosophila* 12 Genomes Consortium 2007). The second dataset gathers gene models reconstructed from expressed sequence tags (ESTs) from nine bee species and the genome of the honey bee *Apis mellifera* (Woodard et al. 2011). This dataset is of particular interest because species of the bee lineage acquired sociality several times independently. Although positive selection scans were previously performed for these datasets, the differences in methodology hinder direct comparisons with our results. For example the fly dataset was analyzed with the site test of Codeml and the bee dataset was analyzed with the branch test of Codeml. Thus we applied the exact same alignment filtering methodology to these data as to the ant data, the same branch-site positive selection test, and the same gene set enrichment test on Gene Ontology functional categories on these two datasets. Differences in topology of the phylogenetic tree of the species cannot be directly controlled for and can be responsible for differences in power of the positive selection test. Similarly, difference in selective pressure at synonymous sites and mutational biases may vary between lineages. Yet, the common methodological framework maximizes chances that differences in the results from these scans can be attributed to biological differences with ants.

In the twelve *Drosophila* dataset, at FDR 10%, 1,365 gene families out of 3,749 (36%) displayed some significant signal of positive selection in at least one branch of the tree, with a maximum of 9.5% positives in the branch leading to the Subgenus *Sophophora*, and a minimum of 0.30% in the branch leading to *D. yakuba* and *D. erecta* (Table S3). In the bee dataset, 461 gene families out of 2,256 displayed episodes of positive selection (20%), with a maximum of 5.8% positives in the branch leading to *Euglossa cordata*, and a minimum of 0.31% in the branch leading to *Apis mellifera* (Table S2). Reassuringly, the numbers of positives were on the same orders of magnitude in the ant, fly and bee datasets .

For the gene set enrichment test, similarly to ants, we considered test scores on all branches of the lineage. The long basal branches leading to *Megachile rotundata* and *Exoneura robusta* were excluded from the bee dataset. In flies, there was an enrichment of positive selection for functions related to chitin binding, metabolism, immune response, proteolysis, receptor activity (e.g., olfactory receptor activity), response to stimulus, localization in the cell, meiosis, membrane, nuclear envelope, extracellular region, chromosome organization, spermatogenesis, regulation of cell cycle, negative regulation of gene expression and wing disc development (Table S4). Mitochondria-related terms were largely absent, with the exception of oxidoreductase activity (but not ranked on top of the list; FDR = 9%). In the bee lineage, positively selected genes belonged to functional categories such as GTPase activity, receptor activity, metabolism, response to hormone stimulus, localization in the cell and proteolysis (Table S5). There was no significant term associated to mitochondria. This is not due to a power issue for the gene set enrichment test since genes with mitochondrial functions appear to be enriched in both the fly and bee datasets (Table S7 and S11). Aside from mitochondria, and more particularly in the bee lineage, the functional categories identified are broadly similar to results in ants. It is difficult to imagine how differences in species tree topology and substitutions patterns – the only differences that could have an impact on the performance of the branch-site test between the three scans – would affect exclusively mitochondrial functions.

# Examples of Codeml control files for the branch-site test

## *Alternative hypothesis*

```
seqfile = 15.phy      * sequence data file name
treefile = 15.01.nwk * tree structure file name
outfile = 15.01.mlc  * main result file name

noisy = 9      * 0,1,2,3,9: how much rubbish on the screen
verbose = 1    * 1: detailed output, 0: concise output
runmode = 0    * 0: user tree; 1: semi-automatic; 2: automatic
               * 3: StepwiseAddition; (4,5):PerturbationNNI; -2: pairwise

seqtype = 1    * 1:codons; 2:AAs; 3:codons-->AAs
CodonFreq = 2 * 0:1/61 each, 1:F1X4, 2:F3X4, 3:codon table
ndata = 1     * specifies the number of separate data sets in the file
clock = 0     * 0: no clock, unrooted tree, 1: clock, rooted tree
aaDist = 0    * 0:equal, +:geometric; -:linear, {1-5:G1974,Miyata,c,p,v}
model = 2     * models for codons:
               * 0:one, 1:b, 2:2 or more dN/dS ratios for branches
NSsites = 2   * 0:one w; 1:NearlyNeutral; 2:PositiveSelection; 3:discrete;
               * 4:freqs; 5:gamma;6:2gamma;7:beta;8:beta&w;9:beta&gamma;10:3normal
icode = 0     * 0:standard genetic code; 1:mammalian mt; 2-10:see below
Mgene = 0     * 0:rates, 1:separate; 2:pi, 3:kappa, 4:all

fix_kappa = 0 * 1: kappa fixed, 0: kappa to be estimated
kappa = 2     * initial or fixed kappa
fix_omega = 0 * 1: omega or omega_1 fixed, 0: estimate
omega = 1     * initial or fixed omega, for codons or codon-based AAs

getSE = 0     * 0: don't want them, 1: want S.E.s of estimates
RateAncestor = 0 * (0,1,2): rates (alpha>0) or ancestral states (1 or 2)
Small_Diff = .5e-6
cleandata = 1 * remove sites with ambiguity data (1:yes, 0:no)?
fix_blength = 0 * 0: ignore, -1: random, 1: initial, 2: fixed
method = 0    * 0: simultaneous; 1: one branch at a time
```

## *Null model*

```
seqfile = 15.phy      * sequence data file name
treefile = 15.01.nwk * tree structure file name
outfile = 15.01.fx.mlc * main result file name

noisy = 9      * 0,1,2,3,9: how much rubbish on the screen
verbose = 1    * 1: detailed output, 0: concise output
runmode = 0    * 0: user tree; 1: semi-automatic; 2: automatic
               * 3: StepwiseAddition; (4,5):PerturbationNNI; -2: pairwise

seqtype = 1    * 1:codons; 2:AAs; 3:codons-->AAs
CodonFreq = 2 * 0:1/61 each, 1:F1X4, 2:F3X4, 3:codon table
ndata = 1     * specifies the number of separate data sets in the file
clock = 0     * 0: no clock, unrooted tree, 1: clock, rooted tree
aaDist = 0    * 0:equal, +:geometric; -:linear, {1-5:G1974,Miyata,c,p,v}
model = 2     * models for codons:
               * 0:one, 1:b, 2:2 or more dN/dS ratios for branches
NSsites = 2   * 0:one w; 1:NearlyNeutral; 2:PositiveSelection; 3:discrete;
               * 4:freqs; 5:gamma;6:2gamma;7:beta;8:beta&w;9:beta&gamma;10:3normal
icode = 0     * 0:standard genetic code; 1:mammalian mt; 2-10:see below
Mgene = 0     * 0:rates, 1:separate; 2:pi, 3:kappa, 4:all

fix_kappa = 0 * 1: kappa fixed, 0: kappa to be estimated
kappa = 2     * initial or fixed kappa
fix_omega = 1 * 1: omega or omega_1 fixed, 0: estimate
omega = 1     * initial or fixed omega, for codons or codon-based AAs
```

```

    getSE = 0 * 0: don't want them, 1: want S.E.s of estimates
RateAncestor = 0 * (0,1,2): rates (alpha>0) or ancestral states (1 or 2)
    Small_Diff = .5e-6
    cleandata = 1 * remove sites with ambiguity data (1:yes, 0:no)?
    fix_blength = 0 * 0: ignore, -1: random, 1: initial, 2: fixed
    method = 0 * 0: simultaneous; 1: one branch at a time

```

## Examples of Codeml control files for the site test

### *Alternative hypothesis (M8)*

```

    seqfile = cds.GUIDANCE.pagan.nnn.0.8.fa
    treefile = cds.GUIDANCE.pagan.nnn.0.8.raxml
    outfile = M8.out

    noisy = 9 * 0,1,2,3,9: how much rubbish on the screen
    verbose = 2 * 0: concise; 1: detailed, 2: too much
    runmode = 0 * 0: user tree; 1: semi-automatic; 2: automatic
                * 3: StepwiseAddition; (4,5):PerturbationNNI; -2: pairwise
    seqtype = 1 * 1:codons; 2:AAs; 3:codons-->AAs
    CodonFreq = 2 * 0:1/61 each, 1:F1X4, 2:F3X4, 3:codon table
*
    ndata = 1
    clock = 0 * 0:no clock, 1:clock; 2:local clock; 3:CombinedAnalysis
    aaDist = 0 * 0:equal, +:geometric; -:linear, 1-6:G1974,Miyata,c,p,v,a
    aaRatefile = /home/talpu/rubi/paml44/dat/wag.dat

    model = 0
                * models for codons:
                * 0:one, 1:b, 2:2 or more dN/dS ratios for branches
                * models for AAs or codon-translated AAs:
                * 0:poisson, 1:proportional, 2:Empirical, 3:Empirical+F
                * 6:FromCodon, 7:AAClasses, 8:REVaa_0, 9:REVaa(nr=189)

    NSsites = 8 * 0:one w;1:neutral;2:selection; 3:discrete;4:freqs;
                * 5:gamma;6:2gamma;7:beta;8:beta&w;9:beta&gamma;
                * 10:beta&gamma+1; 11:beta&normal>1; 12:0&2normal>1;
                * 13:3normal>0

    icode = 0 * 0:universal code; 1:mammalian mt; 2-10:see below
    Mgene = 0
                * codon: 0:rates, 1:separate; 2:diff pi, 3:diff kapa, 4:all diff
                * AA: 0:rates, 1:separate

    fix_kappa = 0 * 1: kappa fixed, 0: kappa to be estimated
    kappa = 2 * initial or fixed kappa
    fix_omega = 0 * 1: omega or omega_1 fixed, 0: estimate
    omega = 1 * initial or fixed omega, for codons or codon-based AAs

*
    fix_alpha = 1 * 0: estimate gamma shape parameter; 1: fix it at alpha
*
    alpha = 0. * initial or fixed alpha, 0:infinity (constant rate)
*
    Malpha = 0 * different alphas for genes
    ncatG = 8 * # of categories in dG of NSsites models

    getSE = 1 * 0: don't want them, 1: want S.E.s of estimates
RateAncestor = 0 * (0,1,2): rates (alpha>0) or ancestral states (1 or 2)

    Small_Diff = .5e-6
    cleandata = 0 * remove sites with ambiguity data (1:yes, 0:no)?
    fix_blength = 1 * 0: ignore, -1: random, 1: initial, 2: fixed
    method = 0 * Optimization method 0: simultaneous; 1: one branch a time

```

### *Null model (M8a)*

```

    seqfile = cds.GUIDANCE.pagan.nnn.0.8.fa
    treefile = cds.GUIDANCE.pagan.nnn.0.8.raxml
    outfile = M8a.out

```

```

noisy = 9 * 0,1,2,3,9: how much rubbish on the screen
verbose = 2 * 0: concise; 1: detailed, 2: too much
runmode = 0 * 0: user tree; 1: semi-automatic; 2: automatic
          * 3: StepwiseAddition; (4,5):PerturbationNNI; -2: pairwise

seqtype = 1 * 1:codons; 2:AAs; 3:codons-->AAs
CodonFreq = 2 * 0:1/61 each, 1:FlX4, 2:F3X4, 3:codon table
*
  ndata = 1
  clock = 0 * 0:no clock, 1:clock; 2:local clock; 3:CombinedAnalysis
  aaDist = 0 * 0:equal, +:geometric; -:linear, 1-6:G1974,Miyata,c,p,v,a
aaRatefile = /home/talpu/rubi/paml44/dat/wag.dat

model = 0
  * models for codons:
  * 0:one, 1:b, 2:2 or more dN/dS ratios for branches
  * models for AAs or codon-translated AAs:
  * 0:poisson, 1:proportional, 2:Empirical, 3:Empirical+F
  * 6:FromCodon, 7:AAClasses, 8:REVaa_0, 9:REVaa(nr=189)

NSsites = 8 * 0:one w;1:neutral;2:selection; 3:discrete;4:freqs;
            * 5:gamma;6:2gamma;7:beta;8:beta&w;9:beta&gamma;
            * 10:beta&gamma+1; 11:beta&normal>1; 12:0&2normal>1;
            * 13:3normal>0

icode = 0 * 0:universal code; 1:mammalian mt; 2-10:see below
Mgene = 0
  * codon: 0:rates, 1:separate; 2:diff pi, 3:diff kapa, 4:all diff
  * AA: 0:rates, 1:separate

fix_kappa = 0 * 1: kappa fixed, 0: kappa to be estimated
  kappa = 2 * initial or fixed kappa
fix_omega = 1 * 1: omega or omega_1 fixed, 0: estimate
  omega = 1 * initial or fixed omega, for codons or codon-based AAs

*
  fix_alpha = 1 * 0: estimate gamma shape parameter; 1: fix it at alpha
*
  alpha = 0. * initial or fixed alpha, 0:infinity (constant rate)
*
  Malpha = 0 * different alphas for genes
  ncatG = 8 * # of categories in dG of NSsites models

getSE = 1 * 0: don't want them, 1: want S.E.s of estimates
RateAncestor = 0 * (0,1,2): rates (alpha>0) or ancestral states (1 or 2)

Small_Diff = .5e-6
cleandata = 0 * remove sites with ambiguity data (1:yes, 0:no)?
fix_blength = 1 * 0: ignore, -1: random, 1: initial, 2: fixed
  method = 0 * Optimization method 0: simultaneous; 1: one branch a time

```

## Newick files for 16 olfactory receptors subtrees

"#" characters indicate the IDs of tested branches, as reported in Table S18.

### Clade 1:

```

(LhOr214#52:0.12700270391109774737,PbOr155#0:0.15115695719430483068,((PbOr162#40:0.127670
95981004664140,(PbOr156FIX#41:0.06912065723405018403,(PbOr160FIX#47:0.0543540491807749798
2,(PbOr159FIX#45:0.04849218372794571880,(PbOr158FIX#42:0.02906122433329262275,PbOr157#43:
0.03376281725807433326)#44:0.03942050956533193345)#46:0.04646045906677091081)#48:0.032683
18554372971058)#49:0.04611026577420087452)#50:0.20155627979239407188,(NvOr261#38:0.331896
33324758538446,(((NvOr256#30:0.07472817364594770695,(NvOr258#32:0.05039805107455570116,N
vOr257#31:0.05050608904167195462)#33:0.07834442018658442641)#34:0.16938432354919935596,(N
vOr255#28:0.18584305712397086729,NvOr260#27:0.25135472314584683673)#29:0.0487927341428094
9073)#35:0.05442767623539263022,((NvOr245#8:0.11949917114384320249,((NvOr262#10:0.0413044
8977170079333,NvOr263#9:0.04937130563266019928)#11:0.07173047213223919527,(NvOr241#13:0.0
3649830016750404277,NvOr243#12:0.08993844906210475554)#14:0.03713426930879297483)#15:0.05
905111656602962666)#16:0.07312961651287799847,(NvOr252#18:0.05010656346318344972,NvOr251
#17:0.05410011513330496846)#19:0.21025708466762274562,(NvOr253#20:0.15018635430508897599,
(NvOr250#21:0.03185269629544653508,NvOr247#22:0.07211623334040800914)#23:0.13973691861200

```

876474)#24:0.05363800920876846817)#25:0.06757557137934989966)#26:0.16156367801895024638)#36:0.04019419297325978885,(NvOr249#4:0.16438483878311427322,NvOr246#5:0.17504495896666197319)#6:0.06183094703029002465,(NvOr242#1:0.25114299996151995265,NvOr248#2:0.29644982714814260838)#3:0.09209660106446855565)#7:0.18014489351874354850)#37:0.11547797001294089758)#39:0.20359534912102003612)#51:0.14421525008022353931)#53;

## Clade 2:

(PbOr176#73:0.06082873108860709088,LhOr215#74:0.08353345534761674740,(((LhOr218#39:0.00508595229713833513,LhOr219FIX#40:0.01306812986974399855)#41:0.20309753047680537130,(((PbOr192#43:0.08396852117914523073,PbOr184NEW#42:0.08825892051780954983)#44:0.05019409634701121892,(LhOr220#46:0.05553828515331037108,PbOr182NEW#45:0.05937380831970199419)#47:0.08714172575459538939)#48:0.02882557447453374527,(PbOr177#50:0.08066248512340329357,PbOr185#49:0.09420379603840116356)#51:0.11039959084735397055)#52:0.08017725547537361830,(PbOr189#53:0.07376054307363721918,PbOr187#54:0.09381812878975828718)#55:0.11704343743263055655,(PbOr180#66:0.07438442813359358308,LhOr217FIX#65:0.09832388052481165486)#67:0.11333760474072096525,(PbOr188FIX#57:0.07319211841743798741,LhOr216#56:0.07929826180456862883)#58:0.07681711963909131080,(PbOr179#59:0.15116957436341549315,(PbOr190FIX#61:0.09502974931755860111,PbOr178#60:0.13593561026870532027)#62:0.05975825668385024991)#63:0.04295060459312043805)#64:0.0358546734065920186)#68:0.03290278308586715161)#69:0.04213635842695823142)#70:0.02724460764805466950)#71:0.04972358634563252278,(NvOr44#0:0.20983718073005075411,(NvOr45#1:0.24374515880998551265,(PbOr194JF#7:0.10132752242257116182,(PbOr195JF#4:0.07318552927135921204,LhOr222#3:0.09151725482589040395)#5:0.02551164126895187970,PbOr193JOI#2:0.13326993861774322214)#6:0.06923954708520733969)#8:0.05670835241989650999,(PbOr181#12:0.17233206426544503409,(PbOr196JF#10:0.06728442567136626307,LhOr223JOI#9:0.07632338427646809254)#11:0.14171167374924883986)#13:0.06989996587889162061)#14:0.06403208467685669869)#15:0.04267581126975338729,(NvOr43#19:0.17630549199790204740,(NvOr46#17:0.18846345356926758052,PbOr191FIX#16:0.21852116812660760115)#18:0.09838471065440075602)#20:0.10050417797038178891,((NvOr48#32:0.20520479115547776705,NvOr47#33:0.23529211380457948355)#34:0.06234813422945846562,(NvOr59#21:0.17979942748144203679,NvOr58#22:0.20537659525162291208)#23:0.08142301811164054381,(NvOr56#24:0.23087166119626123528,(NvOr53#28:0.14582347574470266860,(NvOr50#26:0.17407287249632374948,NvOr51#25:0.19668754689129891444)#27:0.05245509519470525212)#29:0.06182327394637425477)#30:0.04324976757348040352)#31:0.05404031374042227165)#35:0.11063913796319144178)#36:0.06659586664272680590)#37:0.08250691010857801044)#38:0.05457567702126541603)#72:0.13964315019539036422)#75;

## Clade 3:

((LhOr47FIX#2:0.14825294768755742369,PbOr163#1:0.15484356746550523298)#3:0.06006847272929938253,PbOr166#0:0.28579803732196529253)#4:0.09666298326824580844,LhOr59#38:0.42172608620646406807,((PbOr168#8:0.16760099190192406793,(LhOr50#6:0.01912291658990686663,LhOr51#5:0.0462368528333146823)#7:0.14352593428938073550)#9:0.11706087756188153504,(LhOr55#13:0.13871445744291385771,(LhOr52#14:0.15731064777396269738,PbOr170#15:0.17681619961022698728)#16:0.03308287452757098512)#17:0.08394046750557647429,(LhOr54#10:0.11112369129639920740,LhOr56#11:0.18554622372035137201)#12:0.13125253993846636158)#18:0.04522372944504170211)#19:0.02845752858792141224,(PbOr172#20:0.14523439070950164287,(LhOr57#22:0.13822240183453518569,LhOr58#21:0.14275377695965757452)#23:0.04138473458732910837)#24:0.07949866741536493198,(PbOr173#26:0.18328208402641280039,PbOr175#25:0.22942283637932850415)#27:0.06501015390752930279,(LhOr49#31:0.12410098473386869944,PbOr167#32:0.15034893536074842024)#33:0.04185656246491760435,(LhOr48#29:0.14575579529538179591,PbOr164FIX#28:0.18741919016634589479)#30:0.04616045473236166791)#34:0.10822836285965163616)#35:0.04171216768762579796)#36:0.03249126373429089831)#37:0.04693668565656346908)#39;

## Clade 4:

(LhOr224#194:0.06504435792040369479,PbOr197#193:0.08348903213533781509,(((PbOr227#0:0.06176522391653117838,(LhOr227#2:0.02200234638084715838,LhOr228#1:0.04724448386920492710)#3:0.04933393142581436741)#4:0.07998914245664295875,(LhOr229#11:0.04676674479915721161,PbOr229#10:0.07388743043047751868)#12:0.06284001202834139932,(LhOr230#8:0.10335577673619879280,(PbOr230#5:0.07511824212747636453,LhOr231#6:0.09112009180771077355)#7:0.04335344017809714123)#9:0.06507274472893065376)#13:0.03903418690337849550)#14:0.09366516484213024962,(((NvOr126#15:0.05589359230633769021,NvOr124#16:0.07604144192067412156)#17:0.04736403938877526559,NvOr128#18:0.13384899451331291886)#19:0.1331641230614832416,(NvOr119#20:0.04442322241162317831,(NvOr117#22:0.04605681412635846683,NvOr118#21:0.05045349731899097939)#23:0.02699852754059564250)#24:0.18898956931021917982,(NvOr125#26:0.18233343229472204206,NvOr122#25:0.20428820857952811885)#27:0.07152642358899721775)#28:0.02595831089852023571)#29:0.04611936372324701439)#30:0.10842611891270696745,(((NvOr107#34:0.08932820614844806661,(NvOr110#31:0.06700104287603399211,NvOr111#32:0.08957835361537108687)#33:0.07328983554280857349)#35:0.14770157120687424368,(NvOr115#37:0.14610190769251085730,NvOr114#36:0.15304070039950565252)#38:0.04953351894107758946,(NvOr106#40:0.14477996999197065287,NvOr113#39:0.230

25840044462658751)#41:0.03996184879526618050)#42:0.12922378682444354836)#43:0.09057858589  
996808929,(NvOr98#55:0.20515600813616502451,(NvOr105#53:0.21531200668660840924,(NvOr103#4  
4:0.19783488303960186649,(NvOr99#45:0.22934881716895622050,(NvOr100#49:0.1107646489724804  
6448,(NvOr101#47:0.11609804066249530818,NvOr102#46:0.13329996092290880005)#48:0.042743476  
43710470906)#50:0.10890853287333576715)#51:0.05764146843752000759)#52:0.06345497146664048  
904)#54:0.12119801847062493250)#56:0.07158943013685371837)#57:0.05065487739115683702,((L  
hOr226#178:0.17173552585749210508,(LhOr225#179:0.08072203317854952098,(PbOr200#180:0.012  
39884538629845538,PbOr201#181:0.01729820481465962900)#182:0.02873908024839657779,(PbOr199  
FIX#184:0.05133291107751279669,PbOr198FIX#183:0.05746493662568850219)#185:0.0554710823071  
7896077)#186:0.03499219007062884940)#187:0.09302635729937655529)#188:0.100166114870490596  
81,NvOr80#177:0.34513156863301325261)#189:0.04007187567712019310,((NvOr93#159:0.13838922  
397062994318,NvOr94#160:0.25105031492866136666)#161:0.08730431035082647506,(NvOr92#162:0  
.21111631019008858523,NvOr96#163:0.25412796264462572671)#164:0.07893165543625271785,(NvOr  
85#172:0.26004568330752331207,(NvOr87#165:0.06937547196974769292,(NvOr86#166:0.0896171618  
643699068,(NvOr89#168:0.09128589151461544149,NvOr88#167:0.11637507572930734512)#169:0.03  
684886849026364902)#170:0.03759933528303834038)#171:0.16661684623894640334)#173:0.0936092  
6946488531963)#174:0.03456452198989460461)#175:0.06001594860682312599,(NvOr82#131:0.2353  
1513511525115057,((LhOr138#132:0.07617950621418133339,LhOr137#133:0.08173779416394665043  
)#134:0.02630187408907139548,(PbOr202FIX#135:0.0925533537979880000,LhOr139#136:0.1043611  
5056603871565)#137:0.04170959979407941332)#138:0.06615103520112568247,(LhOr144#139:0.0859  
7090735372149573,(LhOr143#153:0.05383791593079666898,(PbOr207#140:0.07908855815766097086  
,LhOr145#141:0.08047765722439555180)#142:0.01432419604896608377,(LhOr142#143:0.022254056  
86454412155,LhOr141#144:0.02612123451726530710)#145:0.05835728971430727274,(LhOr140FIX#14  
6:0.06023088414085454867,(PbOr203#147:0.05048176564343271472,PbOr206FIX#148:0.07293497926  
021914879)#149:0.02445997336843486192)#150:0.01800266797363784740)#151:0.0218456176052402  
4454)#152:0.01919369160337373870)#154:0.02293161076719913913)#155:0.08206439832863024475)  
#156:0.13007903628812014785)#157:0.03629492365495076006,(NvOr81#58:0.26116659387283153171  
,((LhOr129#126:0.15463431011578696039,(LhOr130#117:0.09259255782748161689,(LhOr131#118:0  
.07338436863986312619,(PbOr219#120:0.00657755211625470765,PbOr220#119:0.0097087202547636  
5690)#121:0.03126149524840589333,PbOr221#122:0.04618442653090105987)#123:0.05011340389381  
239296)#124:0.04710643812301686106)#125:0.05646309651803915058)#127:0.0299696386226432978  
7,(PbOr218#98:0.13817529405412767862,((PbOr223JOI#102:0.09554340064719422931,LhOr133#103  
:0.09607330263517104008)#104:0.06773160129828507958,(PbOr225#110:0.05840631065714693010,  
LhOr136#111:0.06129550243431721585)#112:0.02863205998608612038,(PbOr224JOI#105:0.05967930  
446623592039,(LhOr134FIX#106:0.038820340489971165926,LhOr135#107:0.05245443603005721378)#1  
08:0.02734100982652727663)#109:0.02221943921972408670)#113:0.06229415240300216483)#114:0.  
04425715165649175831,(PbOr222FIX#100:0.06781266718986005138,LhOr132#99:0.0967153897948639  
3739)#101:0.12874722722204420822)#115:0.02930940349042825133)#116:0.03016716955933224781)  
#128:0.02784808303268420174,((LhOr127#59:0.10112494322657009094,(LhOr128#61:0.06766822651  
738080285,PbOr217FIX#60:0.08930768486368823034)#62:0.06053751376895628172)#63:0.029995758  
53513243573,((PbOr215#94:0.05952538249328418601,LhOr126#93:0.06817009604892103336)#95:0.0  
8051439876883074998,(LhOr123FIX#85:0.10941278305232279844,(LhOr124#87:0.002649563971068  
87306,LhOr125#86:0.00392835989778709052)#88:0.06142321146866561860,PbOr214#89:0.074580948  
14498580916)#90:0.05655613561670068401)#91:0.05219033802780467801,((PbOr213#81:0.05631993  
231436970004,LhOr122#82:0.06450614786253108801)#83:0.06158604113478619024,((LhOr120FIX#6  
5:0.05896843084347736658,PbOr211JF#64:0.07061465707509259615)#66:0.02880401579988308564,(  
LhOr121#67:0.06197455293106976515,PbOr212#68:0.08059420917722724675)#69:0.029553833821262  
20912)#70:0.02920296751061459903,(LhOr117#78:0.10785050805581858357,(LhOr119#76:0.0738046  
8065395255628,(LhOr118#74:0.05954272437315043937,(PbOr210#71:0.03898825948681169246,PbOr2  
09#72:0.04025791166585995784)#73:0.05318882247522752765)#75:0.02894409437281996941)#77:0.  
04348617686233215152)#79:0.02627827371297620021)#80:0.01797369849325510666)#84:0.02038427  
057785799010)#92:0.03912442310666421064)#96:0.02786144984910120595)#97:0.0293231894675958  
9554)#129:0.12825981947677952966)#130:0.06444625853748782440)#158:0.04837069543325687310)  
#176:0.02960603465005828480)#190:0.06427556076885039549)#191:0.11715824898224512507)#192:  
0.31032493451553094799)#195;

## Clade 5:

(LhOr249#20:0.11567698648139186635,(PbOr247#0:0.13613441893244399017,(PbOr250#2:0.1384167  
6826479470952,PbOr248FIX#1:0.22504147022611128981)#3:0.05170688739146375029)#4:0.06267954  
107689907572,(LhOr250#5:0.15260238988977392616,(PbOr255#6:0.14427136058744652325,(PbOr25  
4#7:0.10596592998757430049,(PbOr252#9:0.02964662589210982982,PbOr253#8:0.0302365662747951  
6176)#10:0.08071848342509982399)#11:0.07558754439449749674)#12:0.04707406066343369777,(Pb  
Or251#13:0.18207115617410660202,(PbOr259#15:0.01342003393894021339,PbOr258FIX#14:0.021438  
45300876345492)#16:0.17807297464121768504)#17:0.04651479841059385362)#18:0.07434689003337  
921487)#19:0.36097074054056921266)#21;

## Clade 6:

(LhOr232#16:0.11833550742016626933, (PbOr233#1:0.06766645099729103052, PbOr234#0:0.12669581414876343595) #2:0.13923645879975890538, ((LhOr234#6:0.08271829219557245982, LhOr235#7:0.08711306875544880257) #8:0.08546456401918384183, (PbOr240#4:0.16224982501208068397, PbOr237#3:0.16991316763588712457) #5:0.08139165401930825716) #9:0.08259964582320121484, ((LhOr238#11:0.10235310175682220402, PbOr242#12:0.11811708940859366734) #13:0.05670355409185014878, PbOr241#10:0.23964131025281165677) #14:0.09628328062232598128) #15:0.05969708117238837347) #17;

## Clade 7:

(LhOr252#46:0.09688591177139660449, (PbOr260FIX#41:0.10329776120361008895, (PbOr262#43:0.01301522482138395102, PbOr261#42:0.02030291376702532055) #44:0.11607996400798416270) #45:0.07006207176210743626, ((LhOr253#1:0.11031350479778091744, PbOr263#0:0.13967675180880764763) #2:0.21505399416570683546, ((LhOr337#3:0.07950616143974434391, PbOr269#4:0.08453503880021727424) #5:0.13487450679949991583, (PbOr268#7:0.08685297892073672033, LhOr263#6:0.08991687232595861612) #8:0.18168917448194313313) #9:0.14013391588614240724, ((PbOr267#10:0.08738671783476144317, LhOr262#11:0.08902269464669325394) #12:0.31697304030811540576, ((LhOr254FIX#13:0.08633555337985482359, (LhOr256#14:0.09335724476444627606, PbOr264#15:0.12012054948630616902) #16:0.04167234786928292883) #17:0.23864328947706012207, (PbOr266#18:0.23793243351172899125, (LhOr257#19:0.13663783793552455870, ((LhOr259#20:0.04371035943999277557, LhOr261#21:0.05684623341365639682) #22:0.05428732855120772804, LhOr255#23:0.13905622541572784656) #24:0.05417510570998938096, ((LhOr244#28:0.12923892990161073291, (LhOr242#30:0.10047284838189202150, LhOr243#29:0.10571426844887030216) #31:0.04005036931491708779) #32:0.01630986891898068836, (LhOr260FIX#25:0.15048057649794957524, LhOr241#26:0.15485882046963569958) #27:0.03048673398894139602) #33:0.05879451328688677092) #34:0.09416933725900324126) #35:0.06413693161577253832) #36:0.24218979410413338238) #37:0.08906417945140721408) #38:0.05129636866962993674) #39:0.12982646880680215329) #40:0.24335335713919573064) #47;

## Clade 8:

(LhOr240#0:0.02659375220041562335, LhOr239#50:0.03797266272919302965, (PbOr244#48:0.14598201985403902459, ((LhOr245#1:0.25494240555791736202, ((PbOr382#3:0.0000093905322139818, PbOr150#4:0.0000093905322139818) #5:0.14050117565847597412, LhOr367#2:0.18525005025552168658) #6:0.15194325809302838137) #7:0.06438092334391085081, ((LhOr246#8:0.13820783637317637926, (PbOr245FIX#9:0.01896935363422937865, PbOr246#10:0.02081636438420580645) #11:0.12486120036977343961) #12:0.14309015851042611311, ((LhOr355#19:0.06046077939710672866, (LhOr357#16:0.03962793750964297562, LhOr358#17:0.04929105040360693551) #18:0.06991349285795393775) #20:0.03452349443888502734, (LhOr356#13:0.06815799862762034200, LhOr360FIX#14:0.10100239059699699096) #15:0.05621657844326546222) #21:0.10382267040952466997, (PbOr372#43:0.19391114791672720008, ((PbOr373FIX#22:0.09364892526891381574, LhOr361#23:0.12791185056684262200) #24:0.05701300962336082467, (PbOr374#25:0.07508352365020541652, (LhOr364FIX#27:0.00031878436060032766, LhOr362FIX#26:0.01829359455369910376) #28:0.05351848543071109632, LhOr363#29:0.09104636782447399213) #30:0.05459504079448435077) #31:0.10868924012011385583) #32:0.02828069977601530699, ((LhOr365#33:0.11310538629193366000, LhOr366#34:0.11898173668373671075) #35:0.03255203912591573406, (PbOr381FIX#39:0.11029154115902831124, (PbOr380#37:0.11561917985044264934, PbOr377#36:0.16327925040951529745) #38:0.03478559067589177822) #40:0.03058909707610408396) #41:0.06288362291539412174) #42:0.04908083236129496402) #44:0.05006665087162787131) #45:0.23105038617011744440) #46:0.05433629773047895378) #47:0.41271540793973204853) #49:0.15800151646562046737) #51;

## Clade 9:

(LhOr349#38:0.10653689323086852625, PbOr400#37:0.12125869977855327497, (PbOr274#35:0.22576861578153556431, ((PbOr280#0:0.17957430472531507593, (PbOr277FIX#2:0.08958783734220689132, PbOr275#1:0.10626137563587727264) #3:0.11025367672366340188) #4:0.13232702713950048046, ((PbOr271#5:0.12589958044388102620, PbOr273#6:0.15242820168087825583) #7:0.03691392816308682739, (LhOr348#8:0.14433441609673261508, (LhOr345#10:0.12616653468319743991, LhOr346#9:0.15424069095171796806) #11:0.07241158011235249159) #12:0.03025773270422742536) #13:0.06345852364149354163, ((LhOr347#14:0.10093178336060988631, PbOr272#15:0.13033369830517391175) #16:0.06391302149997249438, (PbOr279#17:0.16173766888248350404, (LhOr338#18:0.12623919498492863767, PbOr270#19:0.17425320213594025498) #20:0.05229234001437480656, ((LhOr341#24:0.01579422594281186878, (LhOr340FIX#26:0.01394266075224939901, LhOr339FIX#25:0.02378371394374283881) #27:0.00243589059045940665) #28:0.13110017576376253867, (LhOr342#21:0.05065382363233122270, LhOr343#22:0.06654941384567342189) #23:0.18842948248339330686) #29:0.02665653959142357671) #30:0.02934318269573192584) #31:0.09467835410266642326) #32:0.04612386456252177275) #33:0.08167595351471539089) #34:0.20961376214226837278) #36:0.27210174528807190564) #39;

## Clade 10:

(LhOr233#104:0.10026888552919549502, PbOr383#0:0.11943124711136463012, ((PbOr231#98:0.07195201377130676368, (PbOr232FIX#100:0.07633772493638474321, LhOr350#99:0.10059368319248487844)



#101:0.03744469582922363426)#102:0.11560088353420214236,(LhOr325#96:0.2411493179765144545  
5,((LhOr316#90:0.15455975288313530958,(PbOr319#91:0.08583022796349082384,LhOr315#92:0.143  
01453206068850954)#93:0.08700966678505345220)#94:0.04534329891829318171,((PbOr294#84:0.20  
840268913527429384,(LhOr324#86:0.07721886350527594478,PbOr299#85:0.07979688766777880138)#  
87:0.14971258086454808378)#88:0.04351323041425214644,(LhOr333#1:0.30932238016513030621,(  
(LhOr354#20:0.13840933433842239619,PbOr287FIX#19:0.18930929514576572137)#21:0.0784095655  
0818703463,(LhOr319#23:0.12032318270849427788,LhOr318#22:0.13318624840150242172)#24:0.139  
31353284280548199)#25:0.05125290593315037085,(((PbOr292FIX#14:0.00833634056870910696,PbO  
r293FIX#13:0.01415437066231744687)#15:0.09450926653711590186,LhOr320#12:0.111335316485241  
93358)#16:0.13398521862598483656,(LhOr322#7:0.09522595633032165940,PbOr295#8:0.095731728  
10042582248)#9:0.10183749861051004382,PbOr283FIX#10:0.22990740482586377591)#11:0.07854849  
154217806440)#17:0.02398003519893597210,((PbOr297#3:0.09434732590336308844,LhOr323#4:0.12  
037979718851710143)#5:0.13408953191526715165,PbOr296#2:0.28256285312436668633)#6:0.052322  
22848568847395)#18:0.01982654685491656854)#26:0.03034697747126048617)#27:0.02397350037206  
704559,(((LhOr334#64:0.07986733452574333592,PbOr309#65:0.09566414377714232975)#66:0.031  
80255187739687572,(PbOr315#67:0.03774372158057306970,(PbOr312FIX#69:0.003271217178000601  
11,PbOr313FIX#68:0.00356005264607229524)#70:0.02335631606073828789,(PbOr314#72:0.01157164  
769912470519,PbOr311#71:0.02379473000342737996)#73:0.00820647603499710665)#74:0.065282771  
70162924414)#75:0.06033369441751949142)#76:0.10491433095410691856,(PbOr316#77:0.103370262  
71817575940,LhOr336#78:0.14659334060310028058)#79:0.11804099519966340659)#80:0.0418558263  
2964192362,(PbOr320#59:0.16058255207004570875,(LhOr314#60:0.17440164735673382990,LhOr313#  
61:0.18076096815027364872)#62:0.05258239714140428706)#63:0.08598345134378024279)#81:0.025  
90640025241095629,(LhOr317#28:0.18438243916921109866,((PbOr302FIX#30:0.01322281490356184  
627,PbOr301#29:0.01534543350682927507)#31:0.05786170862975911766,LhOr326#32:0.08420301318  
835636539)#33:0.12303305602833532195,(PbOr303#34:0.18583779169833905542,(LhOr332#35:0.09  
460963499216952510,(PbOr307#36:0.04939755928605480545,PbOr323FIX#37:0.0512307948346957392  
5)#38:0.06413196714124407005)#39:0.03842482281597585370,(PbOr304FIX#49:0.059204382990811  
76581,(PbOr322#50:0.03388814992264089360,PbOr305#51:0.04948388639518658261)#52:0.02359562  
879777822586)#53:0.04787201333583579466,(LhOr331#40:0.08723588540366809807,(LhOr327#46:0.  
04818572212264995991,(LhOr328#41:0.04564622210461836277,(LhOr330#42:0.0422236297978672084  
4,LhOr329#43:0.04543517756279642772)#44:0.02322449987296213575)#45:0.02495128683689484470  
)#47:0.02154278971979128876)#48:0.02223426128770717922)#54:0.0440208256287357737)#55:0.1  
2671527823050776629)#56:0.04591138382871283452)#57:0.02891381969374324026)#58:0.021566032  
73030296281)#82:0.03548475754700645274)#83:0.03484020336698994552)#89:0.02115134727741501  
547)#95:0.04786207166171323885)#97:0.22284903716036391641)#103:0.10062646770817308683)#10  
5;

## Clade 11:

((LhOr268#0:0.02863297821869928428,LhOr269#1:0.03807838287175410730)#2:0.1204860593618709  
7021,LhOr264#148:0.16932600071202255632,((LhOr273#3:0.13361363019735783553,(LhOr280#6:0.  
03583575761435609658,LhOr272#5:0.07419757186859761433)#7:0.07405189645970484957,LhOr271#4  
:0.19657554624452636127)#8:0.02699228413793333323)#9:0.03926461058816243382,(((LhOr266FIX  
#10:0.05013227435699574297,LhOr267#11:0.06966143614055107791)#12:0.11415822886070307873,(  
LhOr274FIX#13:0.10808478220261906466,((LhOr275#20:0.03171055070381569724,LhOr276FIX#19:0.  
03490800146541288979)#21:0.10177273753552402991,(LhOr277#14:0.09013900802943551616,(LhOr2  
78#15:0.06208380451233402181,LhOr279#16:0.06490502677472920201)#17:0.09753037794624232204  
)#18:0.04970068698979328986)#22:0.02889564241037491377)#23:0.11989010345447483064)#24:0.0  
427975616960202903,((PbOr395FIX#29:0.16730872384112091544,(PbOr393#26:0.114078230908815  
71981,PbOr394#27:0.12102367281326585624)#28:0.08024149459544548113)#30:0.0231632276627846  
2036,PbOr391#25:0.23539277731323382525)#31:0.03445085802002299802,(((LhOr292#40:0.13538  
445674815094422,(LhOr291#41:0.03119440417307267621,(LhOr290FIX#42:0.0240548222317750773,  
LhOr289FIX#43:0.02752865587475598549)#44:0.02390681227128260700)#45:0.1305936796776337172  
1)#46:0.05367713325445729738,(LhOr288FIX#37:0.18446162180163822031,LhOr293#38:0.196147501  
00857314408)#39:0.04975882803002023430)#47:0.01936090144419236325,(LhOr284#32:0.209422059  
04189911680,(LhOr281#33:0.09573618858845478474,LhOr282#34:0.15881820812447913771)#35:0.07  
707444279580065449)#36:0.03017588994268752614)#48:0.04101100123519996199,(LhOr286#50:0.0  
4965435077709723366,LhOr285#49:0.08767985197384688123)#51:0.17237261787685506653,((PbOr32  
7#59:0.13548695658280729415,(PbOr325FIX#61:0.10666743554421743989,PbOr326#60:0.1687030356  
3853902840)#62:0.07449531232052020169)#63:0.05624238933943424140,(PbOr333#52:0.1430311276  
8455769621,((PbOr331#54:0.08572296284604143113,PbOr329#55:0.10661762641260459639)#56:0.02  
758750759043292547,PbOr330FIX#53:0.15309611687641538902)#57:0.09479455466282606102)#58:0.  
08844632860419450460)#64:0.03357548271098467763)#65:0.02512547816708526893)#66:0.06495655  
541030564972,(((PbOr364#114:0.01658659332148169560,PbOr363FIX#113:0.0309760669323305634  
6)#115:0.04973051362120155250,(PbOr362#110:0.01724928979380072058,PbOr358#111:0.032736330  
07685351065)#112:0.04839231336467382516)#116:0.05496821670661840992,(((PbOr353#122:0.0175  
5561445272167675,PbOr355#121:0.01877540102370938921)#123:0.02466703356076831513,PbOr357FI  
X#120:0.05287947595110589760)#124:0.05451100586671155795,(PbOr350FIX#117:0.00760763869244  
039052,PbOr351FIX#118:0.01051852814136977621)#119:0.10473719409150214488)#125:0.079993851  
57698424287)#126:0.1183845548395866723,((LhOr310#134:0.12504429397033439697,LhOr311#135  
:0.13055956301777038586)#136:0.04559889912223837050,(PbOr365FIX#138:0.1512622099207519554

8, PbOr367FIX#137:0.18034726803397235773) #139:0.03534595260178934051) #140:0.03202142179843  
234931, (LhOr312#127:0.25630906241464956885, (PbOr399#128:0.19274152310197043003, (PbOr398FI  
X#130:0.07779248543002517668, PbOr396FIX#129:0.08432771885045979576) #131:0.144453698651518  
41404) #132:0.07354404719742239915) #133:0.03609529006921920191) #141:0.02863641799748165712  
) #142:0.03916312563275579223, (((PbOr339#77:0.11847818038584242983, PbOr338#76:0.145119702  
62673351550) #78:0.09283742223739958888, (LhOr304#79:0.08409850868505480692, (LhOr302#80:0.0  
3130388693458873578, (LhOr303FIX#81:0.05526108674466199272, LhOr301#82:0.068205269784565258  
91) #83:0.01332619600439463765) #84:0.10572793289415266527) #85:0.11616626173833383140) #86:0  
.03666905085243328533, ((LhOr307#98:0.02841502658148944288, (LhOr306#99:0.0229967255363151  
2337, LhOr305#100:0.02780873893601139638) #101:0.01345138432873636825) #102:0.10201054917775  
405351, (LhOr309#104:0.04266656664312228758, LhOr308#103:0.04678908201318494192) #105:0.1293  
9354651736395541) #106:0.08237634205785901442, (PbOr340FIX#87:0.19249885031452709794, (PbOr3  
41FIX#95:0.09056935556997137982, ((PbOr347#91:0.08337634693332766911, PbOr346#92:0.09603743  
825254229538) #93:0.03434354807601758958, (PbOr342#89:0.09893631615791781408, PbOr344#88:0.1  
1779169599244526667) #90:0.03431678117838254938) #94:0.04370686905461610566) #96:0.079515033  
04466016331) #97:0.0362558772185622643) #107:0.07476797065062266989) #108:0.0275901329171346  
32427, (PbOr337#67:0.21492604917155991306, (LhOr300#68:0.12316930196422916366, (LhOr297#72:0  
.13858498339503541597, (LhOr298#69:0.07124126014892012693, LhOr296#70:0.1043344988842986736  
9) #71:0.06120211332537308507) #73:0.03349446055839892106) #74:0.11808226352264125647) #75:0.0  
11061964464731882662) #109:0.02779909024404219817) #143:0.02525186703369305605) #144:0.07299  
482985036841176) #145:0.03338558849033156778) #146:0.01590629294164431010) #147:0.0329256371  
8897435071) #149;

## Clade 12:

(NvOr294#0:0.14159872467648079719, NvOr293#76:0.16453526157575129596, (NvOr295#74:0.1887954  
9976327444916, (NvOr61#72:0.24958763999852243143, (NvOr41#1:0.30217893556259289856, ((NvOr60  
#68:0.23652733065499143006, LhOr158#67:0.27441564875636526022) #69:0.07414021469656380259, ((  
(LhOr146#31:0.07511238548539500570, PbOr52#2:0.08523243584458076172) #4:0.22635597006331348  
302, ((LhOr147#6:0.05686967463858374344, PbOr53#5:0.07133862663659087944) #7:0.1192856941437  
6273550, (PbOr54FIX#8:0.09727974230879245232, (LhOr150#10:0.04820262820932088438, PbOr56FIX#  
9:0.08626163142386328309) #11:0.05332367855484879127) #12:0.10835199539931381074) #13:0.1076  
9450572735153604) #14:0.06632321187153077113, (((LhOr165#33:0.05392055515893178635, PbOr67#  
32:0.08305337624708959698) #34:0.06461430108938488737, ((LhOr159#41:0.07359338363496840951,  
PbOr64#40:0.07795320054019029554) #42:0.02529105741648814826, (LhOr157#35:0.106080013407863  
35498, (PbOr63#37:0.07850437469905570398, PbOr58#36:0.09021229354658318045) #38:0.0224704911  
4323653590) #39:0.02223893393336068627) #43:0.08541845725821252400) #44:0.069596810302175862  
73, ((PbOr68#29:0.04963198066419766824, PbOr69#28:0.05935082214439147547) #30:0.087810058482  
17886267, (LhOr160#15:0.08717791579722818096, (LhOr170#16:0.09241660522677636047, ((LhOr163#  
20:0.09822963458150404947, (LhOr162#22:0.05985464842908847644, LhOr161#21:0.086502220492316  
70596) #23:0.01721394015257243781) #24:0.01337872665498743806, (LhOr168#17:0.0420557690375085  
04214, LhOr167#18:0.04467310923476502244) #19:0.08150731410622685802) #25:0.0417915434452163  
1564) #26:0.02561697367192869446) #27:0.04663122056440573843) #31:0.06146872476739072277) #45  
:0.15273729213582673547, (LhOr156#63:0.23465795191941685172, ((PbOr66FIX#55:0.1324229880545  
2040744, (LhOr151#53:0.05109357349650206492, (LhOr152#46:0.02202180928329261489, (LhOr153#47  
:0.03058981877151869741, (LhOr154#49:0.01682417341099870511, LhOr155#48:0.02186217313213462  
479) #50:0.01499641932871122879) #51:0.00745374082210316109) #52:0.03720477754946218546) #54:  
0.08793644688847378210) #56:0.10706195495827677822, (PbOr65#60:0.08887628642564660009, (PbOr  
55#57:0.08574017074322998200, LhOr149#58:0.09575566198486880343) #59:0.04276201973623232678  
) #61:0.21621051630460616511) #62:0.10403253700889469879) #64:0.05018006432528555882) #65:0.0  
465935999061952334) #66:0.09887478443638904324) #70:0.07683011620272019171) #71:0.098342113  
56539013238) #73:0.38744395307800272299) #75:0.06825886179606041604) #77;

## Clade 13:

(NvOr62#170:0.11308516969430117138, (NvOr71#167:0.06257026274467908378, NvOr72#168:0.063890  
69158569699036) #169:0.12684795614847121925, (NvOr64#0:0.18129251566872758850, (NvOr65#1:0.1  
4250997447183347266, ((NvOr68#3:0.13387574411152633469, NvOr69#2:0.13603483110998160210) #4  
:0.04382626797347222158, (NvOr67#6:0.12646962023937188824, NvOr66#5:0.14265200463269434028)  
#7:0.04352541838872611701) #8:0.12891584716701351421, ((LhOr71#9:0.07908718294446694108, PbO  
r104#10:0.09686505834210758226) #11:0.12001627737667265594, ((LhOr74#12:0.05300928804888768  
026, PbOr107#13:0.0895991596543858505) #14:0.14489654727400111400, ((LhOr96#16:0.0986818412  
3087871129, PbOr122FIX#15:0.11151296629110694913) #17:0.11361278242293504359, (((LhOr73#95:  
0.05809130994440350748, PbOr106#96:0.08838747200022109562) #97:0.13132925261560285390, (LhOr  
72#99:0.07412007475434589931, PbOr105FIX#98:0.08967631849019770673) #100:0.1639850488754666  
9351) #101:0.05966236963806022947, ((LhOr75#133:0.05542825555520979747, PbOr108#134:0.07162  
425560291810211) #135:0.13046312156454492603, ((PbOr120#136:0.17882364961338445553, (PbOr121  
#137:0.08586022449009408919, (LhOr95#138:0.02682138153199893973, LhOr94#139:0.0326541100890  
0377665) #140:0.07986039741072932518) #141:0.08710389355395155297) #142:0.063965750844586291  
57, ((PbOr109#152:0.07062050179915652093, LhOr76#151:0.08508418047433674580) #153:0.0283783

6879822810271, (PbOr110#148:0.08474143422998055286, LhOr77#149:0.10053277115884261261)#150:0.05498623352625489624)#154:0.03198605302960472879, (LhOr78#143:0.09033713286921089824, (PbOr111#145:0.00487808264248340909, PbOr112#144:0.01710848603673818802)#146:0.10695197218195406919)#147:0.07273266024578448063)#155:0.08365181397735474422)#156:0.02737719202712687525)#157:0.02372717990096075494, ((PbOr114#129:0.07419560971195973686, LhOr80#128:0.07449269271214631338)#130:0.03921903919144634904, LhOr79#127:0.12718465001532625047)#131:0.06988502625811028601, (LhOr85#102:0.09472014064840440783, (LhOr81#124:0.08541739873791071025, ((LhOr86#103:0.10347099915547282312, LhOr92#104:0.10921502868895371918)#105:0.01972361809992578818, LhOr89#106:0.14316241805139770515)#107:0.01351337718328749458, (LhOr87#114:0.09267553623575182364, LhOr91#113:0.09385899146089424216)#115:0.01940780280793059920, (LhOr84#108:0.09183678530815671259, (LhOr83#109:0.08652512987390398314, LhOr82#110:0.08875348768550132827)#111:0.03019407121859854146)#112:0.05617172726688340889)#116:0.01429405967660748143)#117:0.01380211947107188447, ((PbOr115#120:0.07457736270803659584, PbOr116#119:0.08245106605242023823)#121:0.02516996322333782052, PbOr118#118:0.14977511710628124697)#122:0.05767675624528537798)#123:0.01105476436127883315)#125:0.02652587890207258603)#126:0.16346990636222338833)#132:0.07034172089845409925)#158:0.05959968610369913156)#159:0.0256069068612983205, ((LhOr116#26:0.06186219443304359633, PbOr143#25:0.08439999402940603912)#27:0.11455572783041090279, (LhOr97#18:0.09407746617168268044, (PbOr125#22:0.11317593706346353033, (PbOr123FIX#19:0.00052792749707240437, PbOr124FIX#20:0.00211577659493229417)#21:0.11302048761051097792)#23:0.04236399354735360251)#24:0.15341586829756298505)#28:0.03431510710658299684, ((PbOr130#29:0.09349840906727022172, LhOr102#30:0.11266564413750410067)#31:0.12889211831318747592, ((LhOr100#39:0.07410285716280938517, PbOr128#40:0.09726396335378191538)#41:0.05907300751830724117, (LhOr99#36:0.06746218278037467708, LhOr98#35:0.07948889139348086497)#37:0.02126018486421387549, (PbOr127#33:0.06834877672387609793, PbOr126FIX#32:0.07542850278625155835)#34:0.05197608571258643256)#38:0.09191449832867318315)#42:0.09202966894303570011, ((LhOr104#83:0.11920792802578028535, PbOr131#82:0.12817766862571924880)#84:0.06394298663804967586, (LhOr103#88:0.17524911328406081457, (PbOr129JF#86:0.08769582149970496510, LhOr101#85:0.11882451800817882270)#87:0.06181342917333672304)#89:0.04250059068240088361)#90:0.05337237050467650429, (LhOr105FIX#43:0.13120048427178293560, (((LhOr114#73:0.00727591022794480281, LhOr115#72:0.00921091314941304036)#74:0.00791973296028001747, LhOr113#71:0.02033326077945010399)#75:0.10034652721435059763, (PbOr144#76:0.06801466169813279172, PbOr142FIX#77:0.08156278282146152414)#78:0.09977274572823525978)#79:0.07086573889273127536, (LhOr108#67:0.0716502950916457558, PbOr133#68:0.08725688935490120979)#69:0.07298961994870245551, (LhOr112#64:0.07032239942354323592, PbOr141#63:0.10998269966790810703)#65:0.05161353221498058558, (LhOr111#47:0.10703525084627772690, (PbOr140#45:0.04169694109027122925, PbOr139#44:0.04455852554900206069)#46:0.08181618273882200476)#48:0.07445329908624365167, (PbOr138#49:0.10310762068528244795, (LhOr109#57:0.06016172639968349334, LhOr110#58:0.10463741549305008438)#59:0.02523143543401113603, (PbOr134#50:0.04440151252159974665, (PbOr135#51:0.04573561948093250035, (PbOr136FIX#52:0.01563483488267221680, PbOr137#53:0.02335259136648434181)#54:0.06692674475298181214)#55:0.02998599504936700147)#56:0.05532047456699956678)#60:0.02080004595147163723)#61:0.03194094140267877968)#62:0.02075945193170779940)#66:0.01630126438938846178)#70:0.01663752238739617945)#80:0.04030284977806333074)#81:0.11661070090273742417)#91:0.05196845207350933582)#92:0.03079014626850738734)#93:0.04917085148764889502)#94:0.04462522219882416458)#160:0.02848824429860844290)#161:0.03795197235818736914)#162:0.08032505707183343335)#163:0.30650416408991809636)#164:0.21003987801002751978)#165:0.05710601967966152243)#166:0.07746163119346025083)#171;

## Clade 14:

(NvOr298#22:0.19005564634947333391, NvOr299#21:0.33621983118868387086, (LhOr205#0:0.34813805766426531019, (PbOr146#16:0.13011079286996729554, LhOr206NTE#17:0.14620189395838065205)#18:0.19912986285970668554, (LhOr207#1:0.06763695391146691549, PbOr148#2:0.09084226673010761810)#3:0.25108356648207391659, (NvOr289#12:0.20350348734688025742, (LhOr208#10:0.06783770699301336360, PbOr149#9:0.09426446173347946544)#11:0.13416407690090606519)#13:0.09196531960174476883, (NvOr288#4:0.28429906753861922120, (NvOr292#6:0.04827160608298006195, NvOr291#5:0.09629611527230363954)#7:0.26745154641425822328)#8:0.09528218550122788399)#14:0.08020546409463776005)#15:0.07068917811591245159)#19:0.06382492637248762812)#20:0.26358828066340045382)#23;

## Clade 15:

(PbOr77NTE#0:0.05792297001662759237, LhOr172NTE#142:0.08831890085221165421, (PbOr76NTE#140:0.08436100988109158927, ((LhOr203NTE#136:0.07920623091191622556, (PbOr102NTE#134:0.02533720716879305640, PbOr101NTE#133:0.02877708848023225255)#135:0.07024546795574812541)#137:0.12010280309406526356, ((LhOr173NTE#125:0.06202675725317112476, PbOr92NTE#126:0.06324091588351238302)#127:0.10176323863978498085, (LhOr199FN#128:0.01018854931993059577, LhOr201NTE#129:0.01192839100089270604)#130:0.15382707811374812801)#131:0.03047634260959491623, (LhOr202NTE#95:0.18844566573473367499, (LhOr195NTE#101:0.08142016782225212912, (LhOr200NTE#96:0.01155744880136531927, (LhOr198FN#97:0.00788657870731213073, LhOr196NTE#98:0.01101106360489123408)#99:0.01444989305812833906)#100:0.11464726208905072491)#102:0.05584584957867873983, (Lh

Or192NTE#103:0.15342175725314391443, ((LhOr194NTE#117:0.11216330998241010042, LhOr193NTE#118:0.11858685155244778897) #119:0.02214520708711763264, ((LhOr186NTE#104:0.06309147449120475204, (LhOr191FN#105:0.07888803371774559536, LhOr187FN#106:0.0933967587749404415) #107:0.02275249471401205592) #108:0.02243849619062475084, (PbOr84NTE#109:0.08120630733951163249, (PbOr85NTE#113:0.06263616653284509450, (PbOr80FN#110:0.02835579794729253811, PbOr79FN#111:0.03611525327605047408) #112:0.04682744770212756563) #114:0.03774606610645048210) #115:0.02068461892972643656) #116:0.04808170289192485042) #120:0.01925132639367344023) #121:0.0242835752056597871) #122:0.07881453910134704477) #123:0.03551252408190237048, (LhOr185NTE#70:0.09139706390677478087, ((LhOr174NTE#72:0.06829172086054735580, PbOr93NTE#71:0.07662869697183456730) #73:0.03058035805285200942, ((LhOr184NTE#74:0.02129006047789142736, LhOr182NTE#75:0.04301899179902504006) #76:0.05143766439955559794, (LhOr175NTE#77:0.07743341949279816672, ((LhOr183NTE#79:0.01302354425898463557, LhOr181NTE#78:0.01412470150454097489) #80:0.06140486081792014689, (LhOr178FN#81:0.03884714859482228666, ((LhOr179JFN#82:0.01536367019108257279, LhOr180FN#83:0.02937284834987576032) #84:0.00592681081934937765, (LhOr177NTE#86:0.01981522384058501812, LhOr176NTE#85:0.02338223339995399580) #87:0.01672992978119570637) #88:0.00923383562965691441) #89:0.05941621020005746767) #90:0.02262815874446749698) #91:0.05464577280890953875) #92:0.03714402562833796911) #93:0.02315989874077650085) #94:0.11490282662264766911) #124:0.02716821428162348451) #132:0.04420259291847369182) #138:0.03629049243171369316, ((NvOr38#1:0.20739241305848030161, (NvOr35#2:0.10832925329628927125, (NvOr36#4:0.06707780883058439558, NvOr37#3:0.09081931816972528548) #5:0.11963934994928725197) #6:0.08156466618730506823) #7:0.16306197039386788328, ((LhOr69NTE#62:0.04380242946878087212, (PbOr74NTE#63:0.01582453184718538020, PbOr73NTE#64:0.0336873587443377255) #65:0.06569675606659634848) #66:0.19287630274327322022, ((LhOr70NTE#58:0.07481559641465927724, PbOr75NTE#59:0.09424529179350511765) #60:0.17186182715593129045, (PbOr71FN#43:0.09999037454687921544, (PbOr72NTE#44:0.10518945295009879404, (LhOr60NTE#54:0.06949955131787961815, ((LhOr63NTE#49:0.00066584938776774179, LhOr61NTE#48:0.00478923693590505278) #50:0.04659730374775940959, LhOr64NTE#51:0.05217582697562132138) #52:0.01590733510045756749, (LhOr66#46:0.03150059981692060473, LhOr68NTE#45:0.04425337510975680538) #47:0.05359429243030915807) #53:0.01483901860763635686) #55:0.01978056233601944991) #56:0.03239700547461106528) #57:0.18122043218066283266) #61:0.06068723902466284514) #67:0.05992023490827278615, ((NvOr28#31:0.13779720453288551996, (NvOr29#33:0.10412671617023804005, NvOr31#32:0.17105629829895693805) #34:0.05728191686640998065) #35:0.05480260841115020681, (NvOr24#36:0.20305478061915027688, (NvOr25#37:0.1115305563249457352, NvOr26#38:0.16539615485547878859) #39:0.08645929485014544613) #40:0.04453638456705404786) #41:0.13431476507017212074, (((NvOr20#16:0.12139099475971937281, NvOr19#17:0.13046920734375108686) #18:0.07999536278948386758, NvOr15#15:0.21518329776552777566) #19:0.09710074560235230912, ((NvOr14#25:0.1843226307362261187, NvOr13#26:0.25094508544430504937) #27:0.04261331116284578641, (NvOr17#23:0.12272015361578621218, (NvOr12#20:0.06676677696807342688, NvOr16#21:0.07721536288778936552) #22:0.15159912533232741683) #24:0.06824105316534746779) #28:0.04817395590085615797) #29:0.04284908398860182155, ((NvOr27#8:0.12242018717984047560, NvOr23#9:0.14559718422681347527) #10:0.15046427246899291008, (NvOr22#12:0.17747042591341760653, NvOr21#11:0.25132512758363595440) #13:0.05771800262819634653) #14:0.10033134107355362596) #30:0.05458266841251473850) #42:0.06047533236321143285) #68:0.07008321273266669704) #69:0.14014988224512736625) #139:0.07745700581612842417) #141:0.06898845141172013640) #143;

## Clade 16:

(PbOr19#177:0.08508821311292545653, LhOr21#178:0.10063793004694067401, ((PbOr24#0:0.04481280819102938934, PbOr25#1:0.04510290668744612597) #2:0.12855287846272672736, ((LhOr23#3:0.00813712391689357280, LhOr25#4:0.02617908056292785057) #5:0.06757516088380703667, (PbOr20#6:0.0087748283326879806809, PbOr23#7:0.14527149778917111678) #8:0.02953499989983601748) #9:0.03544911292868741653) #10:0.09321653530086784767, (((LhOr39#16:0.07657415574521615753, PbOr37#17:0.10484838326185097479) #18:0.10417583963013607451, (LhOr40FIX#11:0.09948344930305391687, (PbOr40#12:0.09148817912418338860, PbOr38#13:0.11569181255943312980) #14:0.04999572736083818941) #15:0.08531661711502125378) #19:0.08810747008850033923, ((LhOr26#56:0.08201269057550951425, PbOr21#57:0.09215383056055889699) #58:0.12212935793440195253, ((PbOr33#44:0.17154312574357366561, (LhOr30#42:0.07637282295844541324, PbOr28#41:0.08903695198267193300) #43:0.08984449621834446342) #45:0.03987241359933949014, ((PbOr27#46:0.07435022368403622350, LhOr29#47:0.09349161851610551799) #48:0.11727030772057756014, (PbOr26#49:0.08817037784434593461, (PbOr22#51:0.06512356345620586018, LhOr27#50:0.09184549735982269758) #52:0.03060903293736276856) #53:0.10977216223273164597) #54:0.03351513905986234360) #55:0.0230100706868235219) #59:0.02655648129105813229, ((PbOr32#37:0.06622185832675753225, LhOr34#36:0.07424687176349335782) #38:0.02571159148265235450, (PbOr31FIX#34:0.05058108661904277270, PbOr30#33:0.05961835551604051375) #35:0.06800306102379093109) #39:0.03720166405456085817, ((LhOr37#21:0.08078326550446562893, PbOr36FIX#20:0.12079896285405630763) #22:0.05647754509199947454, (LhOr38#23:0.13367630609929329055, (PbOr34#24:0.09341616859804252604, (LhOr35#28:0.04259684184365548909, (LhOr32#26:0.05195927381773565029, LhOr33#25:0.05906474025792859267) #27:0.14425526218644663112) #29:0.04505704416038316257) #30:0.04310138895706434187) #31:0.03733830205488337939) #32:0.04704729549068876332) #40:0.10209397317331087018) #60:0.04517549334518947829) #61:0.08235765592966295956, (((LhOr43#127:0.02513733332597735404, PbOr42#126:0.04597657872554086061) #128:0.08855806899112746156, (PbOr44#129:0.08253972340198312274, LhOr42#130:0.08732389083209488034) #131:0.05559707400862894111) #132:0.09137932689044288292, (LhOr43#133:0.128306097900784649

16,PbOr46#134:0.13988913535371566566)#135:0.17352211289944577399)#136:0.05195228151944623  
896,((LhOr45#113:0.07655178410787882859,(PbOr48#115:0.08202022362306579661,PbOr47#114:0.0  
9176354098068321974)#116:0.03177288929239235199)#117:0.04410158276656572784,(LhOr46#123:0  
.06676908653034788199,(PbOr49#118:0.03344750404966601726,(PbOr50#119:0.048147689055786299  
65,PbOr51#120:0.05679572002408159875)#121:0.02013075301400072889)#122:0.06937336371672113  
422)#124:0.04905241991583712824)#125:0.20339850181996121936)#137:0.06506606342715653968,(  
(NvOr5#139:0.28142229248756600590,(LhOr41#140:0.06087896018391263792,(PbOr39#141:0.05720  
210240613457509,PbOr41#142:0.06528012647148941083)#143:0.04035444330254587403)#144:0.1942  
1920286149263468)#145:0.06721372180865968493,NvOr3#138:0.42809469895142482354)#146:0.0600  
9428302056648435,((PbOr4#150:0.19077026179876477308,(PbOr5#147:0.09783206334010499661,LhO  
r4#148:0.10739142251667260775)#149:0.11093814064127889563)#151:0.21323563928487523911,(N  
vOr2#168:0.16787110639274116508,((PbOr2FIX#164:0.05443396364234111273,LhOr2#165:0.0633731  
4153777132142)#166:0.04017598829601903149,(LhOr3#162:0.07232988277713264802,PbOr3#161:0.0  
8602351370771615935)#163:0.06814392222737826466)#167:0.08753927382062862139)#169:0.203057  
74174619203865,((NvOr9#155:0.12371413697905783713,(NvOr6#157:0.11737171799965644137,NvOr7  
#156:0.13284277567039823320)#158:0.08921062594623745123)#159:0.06942658138578709781,(NvOr  
10#153:0.14492872262006373241,NvOr8#152:0.29254275794174022796)#154:0.0690374935578650511  
5)#160:0.11096708038035126009)#170:0.05460790252378437681)#171:0.04993216767483663748)#17  
2:0.04500294221236822434)#173:0.02030095158002284683,((PbOr18#101:0.07574720500667271594  
,LhOr20#102:0.10511811238254548106)#103:0.195200674223868453504,(PbOr17#108:0.01895432632  
271175713,PbOr16#107:0.04234428644201301134)#109:0.06811362611180034332,(LhOr18#105:0.025  
68499786934699478,LhOr19#104:0.06195732050815315473)#106:0.06592397291281737459)#110:0.20  
977853097591570020)#111:0.04852146996529031753,(LhOr17#62:0.24082056080189864766,(((LhOr  
7#64:0.06662165203526676516,LhOr9#63:0.07513777636342115762)#65:0.04778352298798591719,(L  
hOr8#66:0.08000074194485634616,((PbOr10#68:0.03072644635476671354,PbOr12#67:0.03119077980  
448724946)#69:0.04752137142825769989,PbOr8#70:0.08228274056465445518)#71:0.03849859517475  
068271)#72:0.02219404335170786779)#73:0.05027204377061512269,(LhOr15#74:0.102682767610528  
09454,(LhOr14FIX#75:0.07061141793481469364,LhOr13#76:0.11573813641680856523)#77:0.0682437  
2696336825084)#78:0.07861903298466643708)#79:0.11899465963063966811,(((PbOr6#92:0.0843622  
6407436024644,LhOr5#91:0.10784044864167434408)#93:0.10801798029439961535,(PbOr13#94:0.071  
58154943854977414,LhOr12#95:0.10251194464489998825)#96:0.14006092415763940484)#97:0.06070  
836373421854837,((LhOr16#81:0.08698791141147087236,PbOr14#80:0.09179266124837502649)#82:0  
.08335904310634681402,(LhOr6#88:0.14632383585327285447,(PbOr9#86:0.12741008332801964653,(  
LhOr10#83:0.05207559580666604182,LhOr11#84:0.06845796861281486234)#85:0.08592211832516460  
923)#87:0.09902873777138196387)#89:0.03836447326544246972)#90:0.09935846517202116812)#98:  
0.04494903189312279140)#99:0.10599604270141928242)#100:0.04841211025913769173)#112:0.0654  
9422589417622231)#174:0.04300868066299180781)#175:0.09192643181901923033)#176:0.136847857  
78034441739)#179;

## Figure S1

See separate file *Sup\_Figure\_1.pdf*

Positive selection in the olfactory receptors gene family. This tree is similar to Figure 3, with Sequence IDs and bootstrap values displayed.

## Figure S2

Density plots of expression levels in *Solenopsis invicta* of 313 genes with mitochondrial activity in queens (blue), males (red) and workers (green), at the pupal stage (top) and the adult stage (bottom). Expression was obtained from previously published microarray data (Ometto et al. 2011). Paired *t*-test indicated that the expression of mitochondrial genes was higher in workers compared to queens at the larval stage ( $p=2.6e-05$ ), and not significantly different at the adult stage ( $p=0.11$ ). The expression of mitochondrial genes was the lowest in males at both developmental stages (all  $p$ -values were below  $10^{-6}$ ).

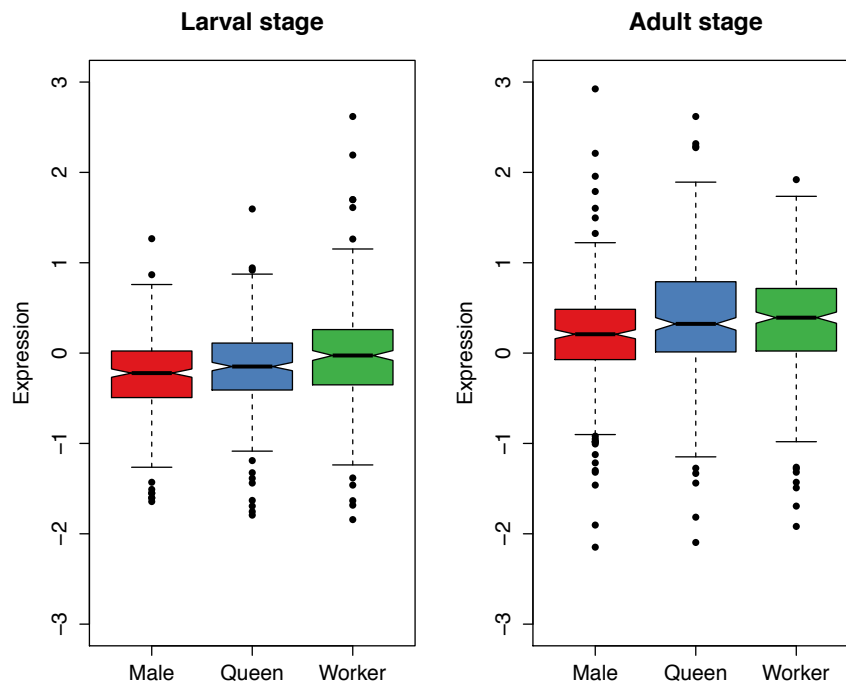

### Figure S3

Phylogeny of the five ant species and the four outgroup species used in the ant mitochondrial dataset. Branch lengths are arbitrary. The 11 different branches where positive selection was tested are labeled and highlighted in red. Legend as in Figure 1.

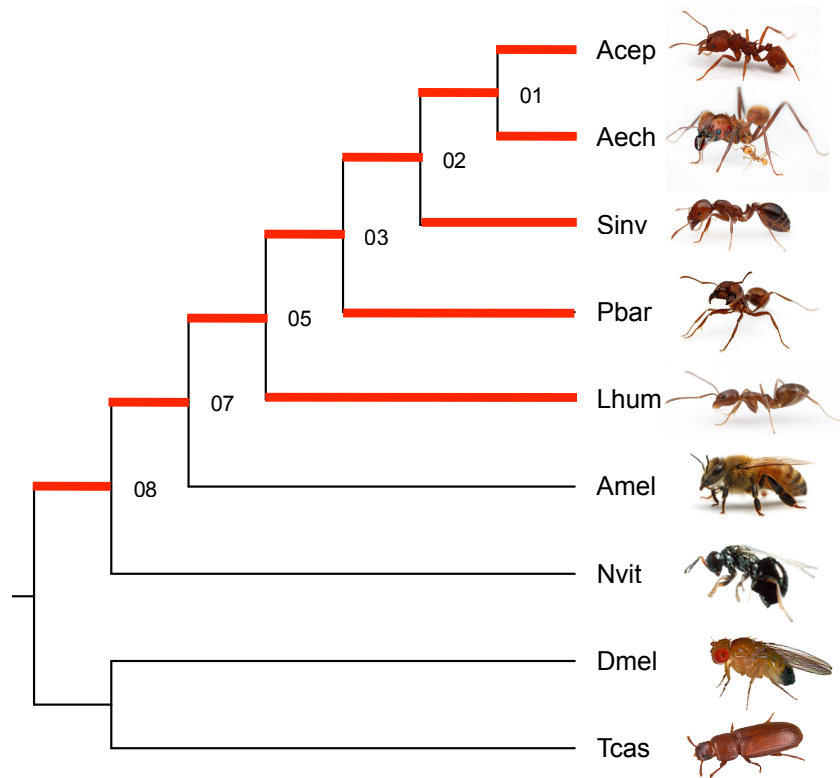

## Figure S4

Phylogeny of the twelve *Drosophila* species dataset. Branch lengths are arbitrary. All branches were tested for positive selection and branch labels are shown. Legend as in Figure 1.

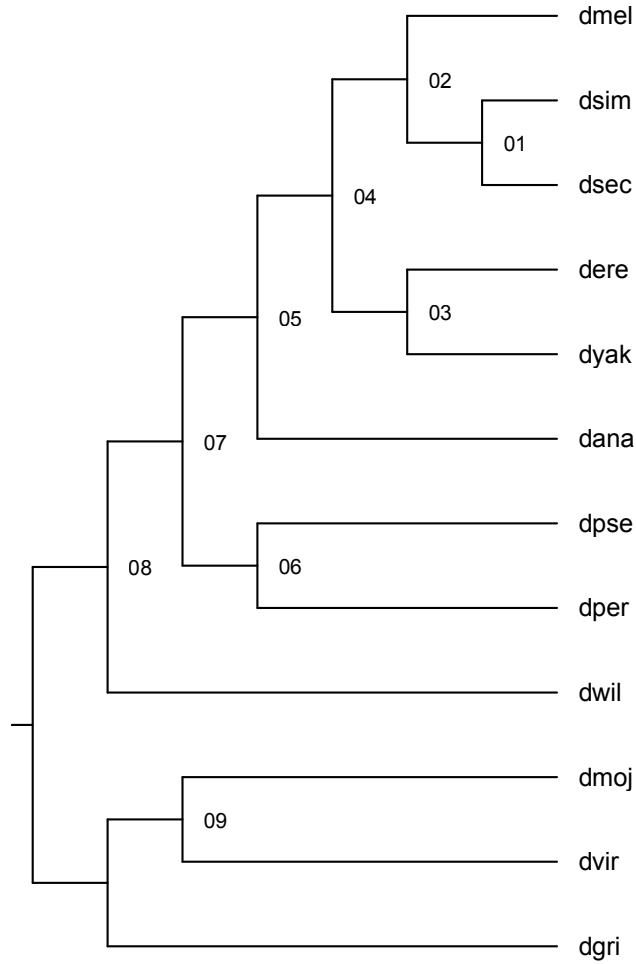



## Figure S5

Phylogeny of the ten bee species dataset. Branch lengths are arbitrary. All branches were tested for positive selection and branch labels are shown. Legend as in Figure 1.

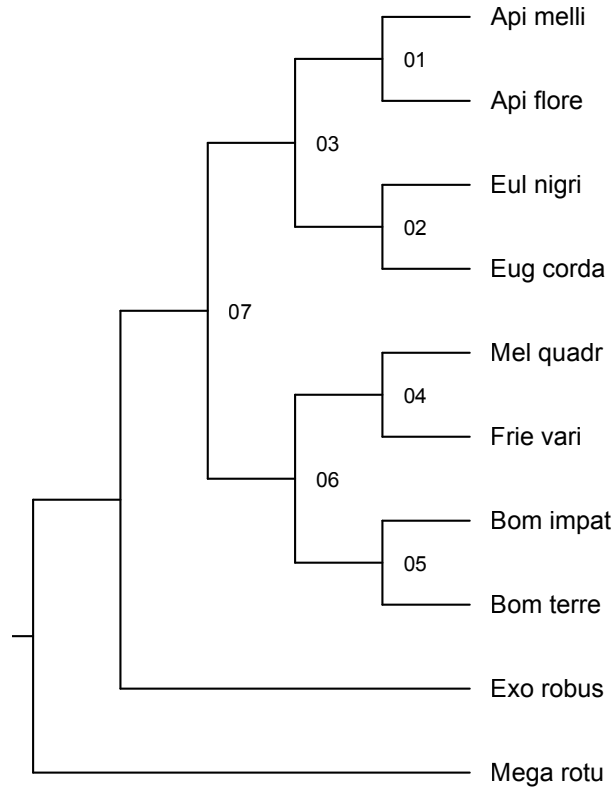

## Figure S6

Density plots of SUMSTAT scores of random gene sets calculated on 10,000 randomized gene sets of size  $n=11$  (minimum set size used in our study; left),  $n=25$  (middle) and  $n=100$  (right) are shown in black. The distribution of these scores closely approximates a normal distribution (shown in red) of mean equals  $n$  times the mean score of all genes and variance equals  $n$  times the variance of scores of all genes.

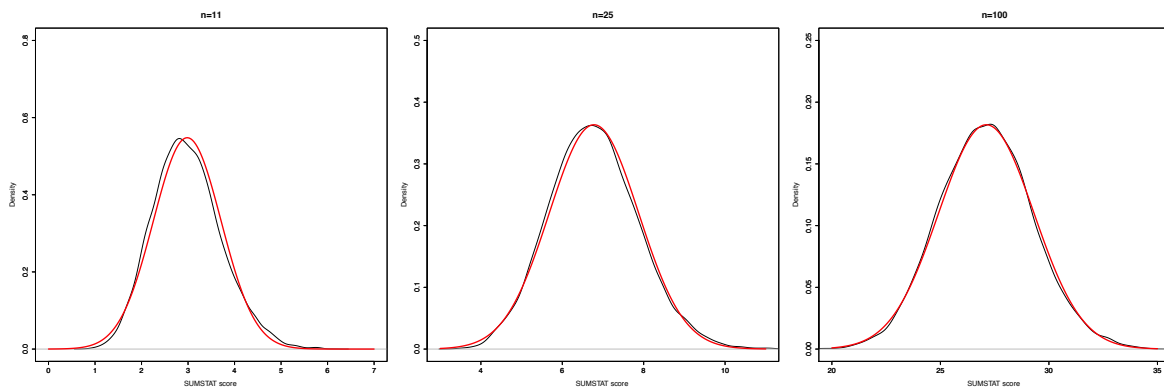

## Figure S7

Distribution of scores in Gene Ontology functional categories enriched for positively selected genes. Density plots of scores of genes belonging to individual GO categories are plotted in red and are compared to density plots of scores of all genes analyzed in blue.

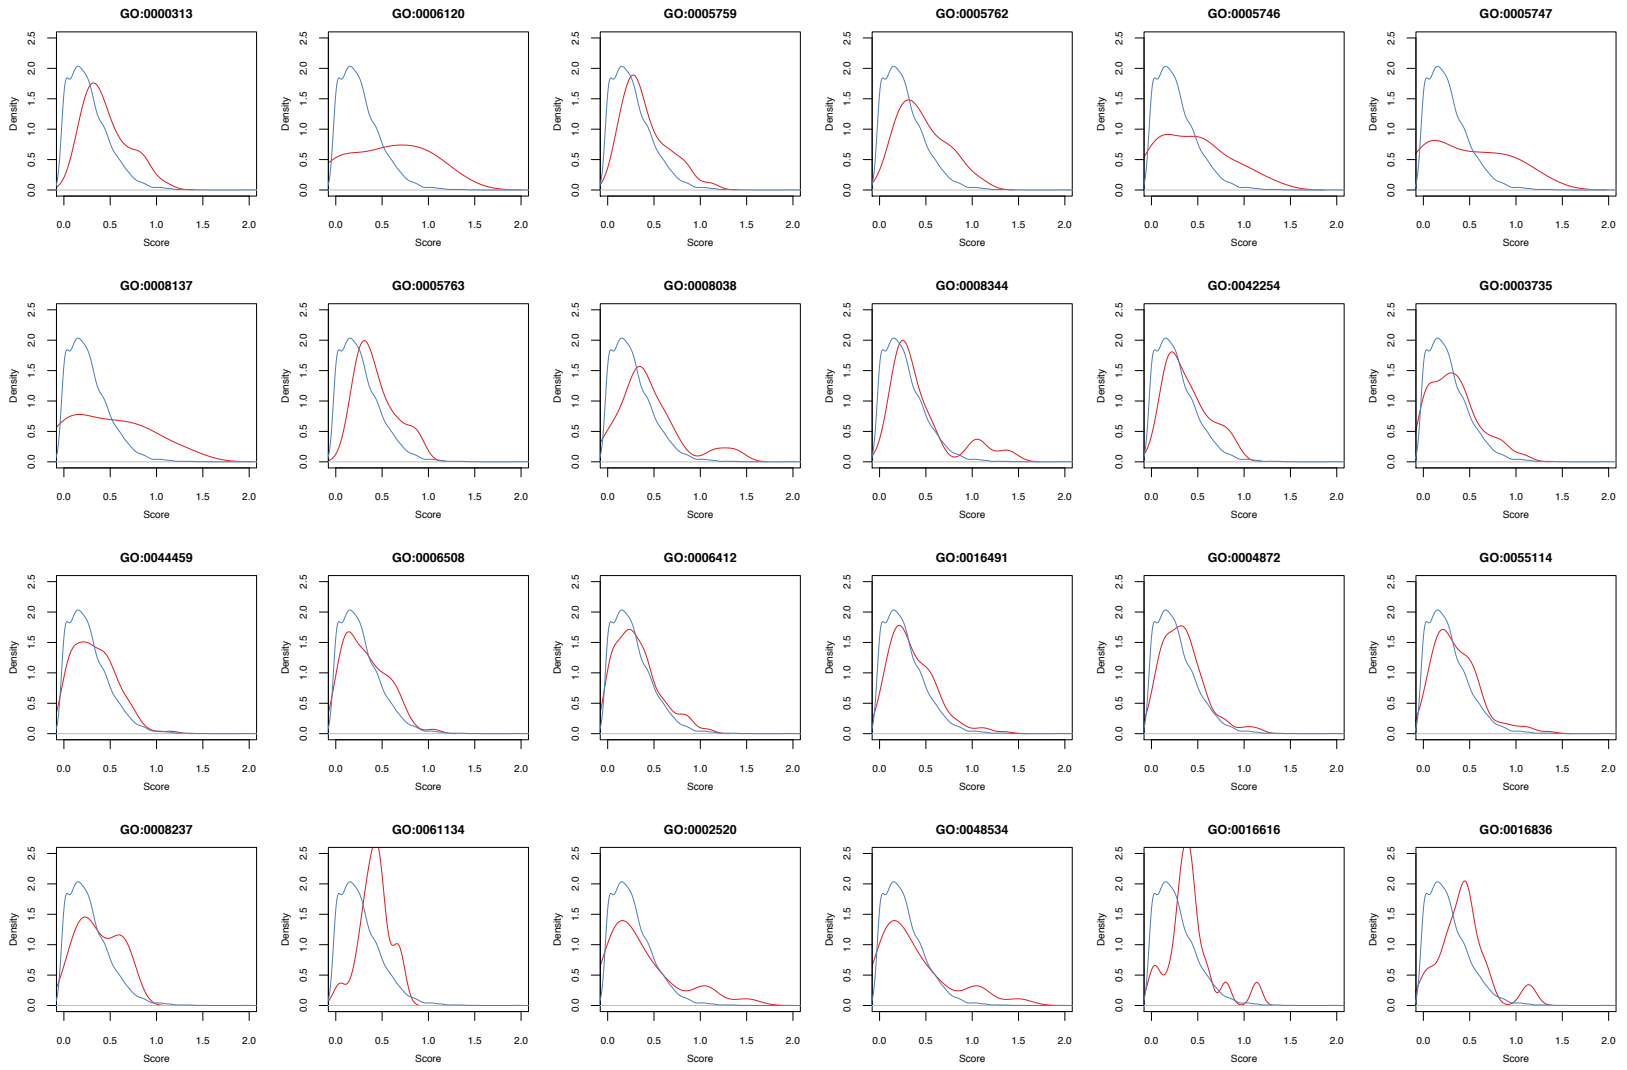

## References

- Drosophila 12 Genomes Consortium. 2007. Evolution of genes and genomes on the *Drosophila* phylogeny. *Nature* 450:203-218.
- Duret L, Galtier N. 2009. Biased Gene Conversion and the Evolution of Mammalian Genomic Landscapes. *Annu Rev Genomics Hum Genet* 10:285-311.
- Fletcher W, Yang Z. 2010. The Effect of Insertions, Deletions, and Alignment Errors on the Branch-Site Test of Positive Selection. *Mol Biol Evol* 27:2257-2267.
- Galtier N, Duret L, Glémin S, Ranwez V. 2009. GC-biased gene conversion promotes the fixation of deleterious amino acid changes in primates. *Trends Genet* 25:1-5.
- Gharib WH, Robinson-Rechavi M. 2013. The branch-site test of positive selection is surprisingly robust but lacks power under synonymous substitution saturation and variation in GC. *Mol Biol Evol* 30:1675-1686.
- Jordan G, Goldman N. 2012. The effects of alignment error and alignment filtering on the sitewise detection of positive selection. *Mol Biol Evol* 29:1125-1139.
- Loytynoja A, Vilella AJ, Goldman N. 2012. Accurate extension of multiple sequence alignments using a phylogeny-aware graph algorithm. *Bioinformatics* 28:1684-1691.
- Luo C, Tsementzi D, Kyrpides N, Read T, Konstantinidis KT. 2012. Direct Comparisons of Illumina vs. Roche 454 Sequencing Technologies on the Same Microbial Community DNA Sample. *PLoS ONE* 7:e30087.
- Mallick S, Gnerre S, Muller P, Reich D. 2009. The difficulty of avoiding false positives in genome scans for natural selection. *Genome Res* 19:922-933.
- Markova-Raina P, Petrov D. 2011. High sensitivity to aligner and high rate of false positives in the estimates of positive selection in the 12 *Drosophila* genomes. *Genome Res* 21:863-874.
- Ometto L, Shoemaker D, Ross KG, Keller L. 2011. Evolution of Gene Expression in Fire Ants: The Effects of Developmental Stage, Caste, and Species. *Mol Biol Evol* 28:1381-1392.
- Penn O, Privman E, Landan G, Graur D, Pupko T. 2010. An alignment confidence score capturing robustness to guide tree uncertainty. *Mol Biol Evol* 27:1759-1767.
- Privman E, Penn O, Pupko T. 2012. Improving the performance of positive selection inference by filtering unreliable alignment regions. *Mol Biol Evol* 29:1-5.
- Ratnakumar A, Mousset S, Glémin S, Berglund J, Galtier N, Duret L, Webster MT. 2010. Detecting positive selection within genomes: the problem of biased gene conversion. *Philos Trans R Soc Lond B Biol Sci* 365:2571-2580.
- Schneider A, Souvorov A, Sabath N, Landan G, Gonnet GH, Graur D. 2009. Estimates of Positive Darwinian Selection Are Inflated by Errors in Sequencing, Annotation, and Alignment. *Genome Biol Evol* 1:114-118.
- Simola DF, Wissler L, Donahue G, et al. 2013. Social insect genomes exhibit dramatic evolution in gene composition and regulation while preserving regulatory features linked to sociality. *Genome Res* 23:1235-1247.

- Studer RA, Penel S, Duret L, Robinson-Rechavi M. 2008. Pervasive positive selection on duplicated and nonduplicated vertebrate protein coding genes. *Genome Res* 18:1393-1402.
- Studer RA, Robinson-Rechavi M. 2009. How confident can we be that orthologs are similar, but paralogs differ? *Trends Genet* 25:210-216.
- Woodard SH, Fischman BJ, Venkat A, Hudson ME, Varala K, Cameron SA, Clark AG, Robinson GE. 2011. Genes involved in convergent evolution of eusociality in bees. *Proc Natl Acad Sci USA* 108:7472-7477.
- Yang Z, dos Reis M. 2011. Statistical Properties of the Branch-Site Test of Positive Selection. *Mol Biol Evol* 28:1217-1228.
- Yang Z, Nielsen R, Goldman N, Pedersen A-MK. 2000. Codon-Substitution Models for Heterogeneous Selection Pressure at Amino Acid Sites. *Genetics* 155:431-449.
